# Supplementary material for: Systematic analysis of nuclear gene function in respiratory growth and expression of the mitochondrial genome in S. cerevisiae
Source: PubMed Central journal article supplement (PMC7453639; doi:10.15698/mic2020.09.729), 2020-06-30
Supplement: mic-07-234-s01.pdf [file mic-07-234-s01.pdf]

## SUPPLEMENTAL TABLES

### **Systematic analysis of nuclear gene function in respiratory growth and expression of the mitochondrial genome in *S. cerevisiae***

Maria Stenger, Duc Tung Le, Till Klecker, Benedikt Westermann  
Zellbiologie, Universität Bayreuth, 95440 Bayreuth, Germany

**Table S1.** Combined results of four genome-wide screens to obtain high confidence *pet* genes. This table contains all ORFs and dubious ORFs from all non-mitochondrial chromosomes. The list has been taken from the Saccharomyces Genome Database, SGD, ([www.yeastgenome.org](http://www.yeastgenome.org); [36]) on September 25, 2019. For each ORF, the systematic gene name, the standard gene name and a brief description of the protein function according to SGD are given. Furthermore, this list contains the presence of the protein in a high confidence mitochondrial proteome [8], the results of the four *pet* screens ([18, 23, 25] and this work), and the *pet* score. The value "nd" indicates that the deletion mutant has not been tested (in most cases because it was missing from the deletion collection that was used for the screen). Some ORFs have been renamed or merged. In this case, the ORF name from the original dataset has been updated to the new nomenclature.

**Table S1 is supplied as a separate Excel file.**

#### **References**

8. Morgenstern M, Stiller SB, Lubbert P, Peikert CD, Dannenmaier S, Drepper F, Weill U, Hoss P, Feuerstein R, Gebert M, Bohnert M, van der Laan M, Schuldiner M, Schutze C, Oeljeklaus S, Pfanner N, Wiedemann N, Warscheid B (2017). Definition of a high-confidence mitochondrial proteome at quantitative scale. **Cell Rep** 19(13): 2836-2852. doi: 10.1016/j.celrep.2017.06.014.
18. Merz S, Westermann B (2009). Genome-wide deletion mutant analysis reveals genes required for respiratory growth, mitochondrial genome maintenance and mitochondrial protein synthesis in *Saccharomyces cerevisiae*. **Genome Biol** 10(9): R95. doi: 10.1186/gb-2009-10-9-r95.
23. Dimmer KS, Fritz S, Fuchs F, Messerschmitt M, Weinbach N, Neupert W, Westermann B (2002). Genetic basis of mitochondrial function and morphology in *Saccharomyces cerevisiae*. **Mol Biol Cell** 13(3): 847-853. doi: 10.1091/mbc.01-12-0588.
25. Luban C, Beutel M, Stahl U, Schmidt U (2005). Systematic screening of nuclear encoded proteins involved in the splicing metabolism of group II introns in yeast mitochondria. **Gene** 354(72-79). doi: 10.1016/j.gene.2005.03.023.
36. Cherry JM, Hong EL, Amundsen C, Balakrishnan R, Binkley G, Chan ET, Christie KR, Costanzo MC, Dwight SS, Engel SR, Fisk DG, Hirschman JE, Hitz BC, Karra K, Krieger CJ, Miyasato SR, Nash RS, Park J, Skrzypek MS, Simison M, Weng S, Wong ED (2012). Saccharomyces Genome Database: the genomics resource of budding yeast. **Nucleic Acids Res** 40(Database issue): D700-705. doi: 10.1093/nar/gkr1029.

**Table S2.** High confidence *pet* genes in yeast. This table contains the systematic gene name according to SGD, the standard gene name according to SGD, the presence of the encoded protein in a high confidence mitochondrial proteome [8], the *pet* score, and for dubious ORFs a list of overlapping genomic features according to SGD, including their respective *pet* score (overlapping dubious ORFs have not been annotated). This table is an excerpt of data compiled in Table S1. Genes were manually grouped into functional categories.

### Reference

8. Morgenstern M, Stiller SB, Lubbert P, Peikert CD, Dannenmaier S, Drepper F, Weill U, Hoss P, Feuerstein R, Gebert M, Bohnert M, van der Laan M, Schuldiner M, Schutze C, Oeljeklaus S, Pfanner N, Wiedemann N, Warscheid B (2017). Definition of a high-confidence mitochondrial proteome at quantitative scale. **Cell Rep** 19(13): 2836-2852. doi: 10.1016/j.celrep.2017.06.014.

Stenger et al. - Table S2

| ORF                                                 | standard name | Morgenstern et al. (2017) | <i>pet</i> score | overlapping ORFs |
|-----------------------------------------------------|---------------|---------------------------|------------------|------------------|
| <b>Mitochondrial translation and RNA maturation</b> |               |                           |                  |                  |
| <i>YBL038W</i>                                      | <i>MRPL16</i> | mitochondrial             | 0.75             |                  |
| <i>YBL080C</i>                                      | <i>PET112</i> | mitochondrial             | 0.75             |                  |
| <i>YBL090W</i>                                      | <i>MRP21</i>  | mitochondrial             | 1.00             |                  |
| <i>YBR122C</i>                                      | <i>MRPL36</i> | mitochondrial             | 1.00             |                  |
| <i>YBR251W</i>                                      | <i>MRPS5</i>  | mitochondrial             | 0.75             |                  |
| <i>YBR268W</i>                                      | <i>MRPL37</i> | mitochondrial             | 0.75             |                  |
| <i>YBR282W</i>                                      | <i>MRPL27</i> | mitochondrial             | 1.00             |                  |
| <i>YCR003W</i>                                      | <i>MRPL32</i> | mitochondrial             | 1.00             |                  |
| <i>YCR024C</i>                                      | <i>SLM5</i>   | mitochondrial             | 1.00             |                  |
| <i>YCR046C</i>                                      | <i>IMG1</i>   | mitochondrial             | 1.00             |                  |
| <i>YCR071C</i>                                      | <i>IMG2</i>   | mitochondrial             | 1.00             |                  |
| <i>YDL045W-A</i>                                    | <i>MRP10</i>  | mitochondrial             | 0.75             |                  |
| <i>YDL069C</i>                                      | <i>CBS1</i>   | mitochondrial             | 0.75             |                  |
| <i>YDL202W</i>                                      | <i>MRPL11</i> | mitochondrial             | 0.75             |                  |
| <i>YDR115W</i>                                      | <i>MRX14</i>  | mitochondrial             | 0.75             |                  |
| <i>YDR175C</i>                                      | <i>RSM24</i>  | mitochondrial             | 1.00             |                  |
| <i>YDR197W</i>                                      | <i>CBS2</i>   | mitochondrial             | 0.75             |                  |
| <i>YDR237W</i>                                      | <i>MRPL7</i>  | mitochondrial             | 0.75             |                  |
| <i>YDR268W</i>                                      | <i>MSW1</i>   | mitochondrial             | 0.75             |                  |
| <i>YDR296W</i>                                      | <i>MHR1</i>   | mitochondrial             | 0.75             |                  |
| <i>YDR337W</i>                                      | <i>MRPS28</i> | mitochondrial             | 0.75             |                  |
| <i>YDR347W</i>                                      | <i>MRP1</i>   | mitochondrial             | 0.75             |                  |
| <i>YDR350C</i>                                      | <i>ATP22</i>  | mitochondrial             | 0.75             |                  |
| <i>YDR405W</i>                                      | <i>MRP20</i>  | mitochondrial             | 0.75             |                  |
| <i>YEL050C</i>                                      | <i>RML2</i>   | mitochondrial             | 0.75             |                  |
| <i>YER050C</i>                                      | <i>RSM18</i>  | mitochondrial             | 1.00             |                  |
| <i>YER087W</i>                                      | <i>AIM10</i>  | mitochondrial             | 1.00             |                  |
| <i>YER153C</i>                                      | <i>PET122</i> | mitochondrial             | 0.75             |                  |
| <i>YGL107C</i>                                      | <i>RMD9</i>   | mitochondrial             | 0.75             |                  |
| <i>YGL129C</i>                                      | <i>RSM23</i>  | mitochondrial             | 1.00             |                  |
| <i>YGL143C</i>                                      | <i>MRF1</i>   | mitochondrial             | 1.00             |                  |
| <i>YGR076C</i>                                      | <i>MRPL25</i> | mitochondrial             | 0.75             |                  |
| <i>YGR150C</i>                                      | <i>CCM1</i>   | mitochondrial             | 1.00             |                  |
| <i>YGR171C</i>                                      | <i>MSM1</i>   | mitochondrial             | 0.75             |                  |
| <i>YGR215W</i>                                      | <i>RSM27</i>  | mitochondrial             | 1.00             |                  |
| <i>YGR220C</i>                                      | <i>MRPL9</i>  | mitochondrial             | 1.00             |                  |
| <i>YGR222W</i>                                      | <i>PET54</i>  | mitochondrial             | 1.00             |                  |
| <i>YHL004W</i>                                      | <i>MRP4</i>   | mitochondrial             | 1.00             |                  |
| <i>YHL038C</i>                                      | <i>CBP2</i>   | mitochondrial             | 1.00             |                  |
| <i>YHR011W</i>                                      | <i>DIA4</i>   | mitochondrial             | 1.00             |                  |
| <i>YHR038W</i>                                      | <i>RRF1</i>   | mitochondrial             | 0.75             |                  |
| <i>YHR091C</i>                                      | <i>MSR1</i>   | mitochondrial             | 1.00             |                  |
| <i>YHR147C</i>                                      | <i>MRPL6</i>  | mitochondrial             | 1.00             |                  |
| <i>YHR168W</i>                                      | <i>MTG2</i>   | mitochondrial             | 0.75             |                  |
| <i>YIR021W</i>                                      | <i>MRS1</i>   | mitochondrial             | 0.75             |                  |
| <i>YJL063C</i>                                      | <i>MRPL8</i>  | mitochondrial             | 0.75             |                  |
| <i>YJL096W</i>                                      | <i>MRPL49</i> | mitochondrial             | 1.00             |                  |

| <b>ORF</b> | <b>standard name</b> | <b>Morgenstern et al. (2017)</b> | <b>pet score</b> | <b>overlapping ORFs</b> |
|------------|----------------------|----------------------------------|------------------|-------------------------|
| YJL102W    | MEF2                 | mitochondrial                    | 0.75             |                         |
| YJL209W    | CBP1                 | mitochondrial                    | 0.75             |                         |
| YJR113C    | RSM7                 | mitochondrial                    | 1.00             |                         |
| YKL003C    | MRP17                | mitochondrial                    | 1.00             |                         |
| YKL138C    | MRPL31               | mitochondrial                    | 0.75             |                         |
| YKL155C    | RSM22                | mitochondrial                    | 1.00             |                         |
| YKL170W    | MRPL38               | mitochondrial                    | 1.00             |                         |
| YKL194C    | MST1                 | mitochondrial                    | 1.00             |                         |
| YKR006C    | MRPL13               | mitochondrial                    | 1.00             |                         |
| YKR085C    | MRPL20               | mitochondrial                    | 0.75             |                         |
| YLR067C    | PET309               | mitochondrial                    | 1.00             |                         |
| YLR069C    | MEF1                 | mitochondrial                    | 0.75             |                         |
| YLR091W    | GEP5                 | mitochondrial                    | 0.75             |                         |
| YLR139C    | SLS1                 | mitochondrial                    | 1.00             |                         |
| YLR203C    | MSS51                | mitochondrial                    | 1.00             |                         |
| YLR312W-A  | MRPL15               | mitochondrial                    | 1.00             |                         |
| YLR382C    | NAM2                 | mitochondrial                    | 0.75             |                         |
| YLR439W    | MRPL4                | mitochondrial                    | 0.75             |                         |
| YMR064W    | AEP1                 | mitochondrial                    | 1.00             |                         |
| YMR097C    | MTG1                 | mitochondrial                    | 0.75             |                         |
| YMR098C    | ATP25                | mitochondrial                    | 1.00             |                         |
| YMR158W    | MRPS8                | mitochondrial                    | 0.75             |                         |
| YMR193W    | MRPL24               | mitochondrial                    | 0.75             |                         |
| YMR257C    | PET111               | mitochondrial                    | 1.00             |                         |
| YMR282C    | AEP2                 | mitochondrial                    | 0.75             |                         |
| YMR286W    | MRPL33               | mitochondrial                    | 1.00             |                         |
| YMR293C    | HER2                 | mitochondrial                    | 1.00             |                         |
| YNL005C    | MRP7                 | mitochondrial                    | 1.00             |                         |
| YNL073W    | MSK1                 | mitochondrial                    | 1.00             |                         |
| YNL081C    | SWS2                 | mitochondrial                    | 1.00             |                         |
| YNL177C    | MRPL22               | mitochondrial                    | 1.00             |                         |
| YNL185C    | MRPL19               | mitochondrial                    | 1.00             |                         |
| YNL252C    | MRPL17               | mitochondrial                    | 0.75             |                         |
| YNL284C    | MRPL10               | mitochondrial                    | 0.75             |                         |
| YNR036C    | MRPS12               | mitochondrial                    | 0.75             |                         |
| YNR037C    | RSM19                | mitochondrial                    | 1.00             |                         |
| YNR045W    | PET494               | mitochondrial                    | 0.75             |                         |
| YOL023W    | IFM1                 | mitochondrial                    | 0.75             |                         |
| YOL033W    | MSE1                 | mitochondrial                    | 1.00             |                         |
| YOR150W    | MRPL23               | mitochondrial                    | 1.00             |                         |
| YOR158W    | PET123               | mitochondrial                    | 1.00             |                         |
| YOR187W    | TUF1                 | mitochondrial                    | 1.00             |                         |
| YOR205C    | GEP3                 | mitochondrial                    | 0.75             |                         |
| YOR350C    | MNE1                 | mitochondrial                    | 0.75             |                         |
| YPL005W    | AEP3                 | mitochondrial                    | 0.75             |                         |
| YPL013C    | MRPS16               | mitochondrial                    | 1.00             |                         |
| YPL097W    | MSY1                 | mitochondrial                    | 1.00             |                         |
| YPL104W    | MSD1                 | mitochondrial                    | 0.75             |                         |
| YPL118W    | MRP51                | mitochondrial                    | 0.75             |                         |

| <b>ORF</b>                                               | <b>standard name</b> | <b>Morgenstern et al. (2017)</b> | <b>pet score</b> | <b>overlapping ORFs</b> |
|----------------------------------------------------------|----------------------|----------------------------------|------------------|-------------------------|
| <i>YPL173W</i>                                           | <i>MRPL40</i>        | mitochondrial                    | 1.00             |                         |
| <i>YPR047W</i>                                           | <i>MSF1</i>          | mitochondrial                    | 0.75             |                         |
| <i>YPR100W</i>                                           | <i>MRPL51</i>        | mitochondrial                    | 0.75             |                         |
| <i>YPR116W</i>                                           | <i>RRG8</i>          | mitochondrial                    | 1.00             |                         |
| <b>Mitochondrial transcription</b>                       |                      |                                  |                  |                         |
| <i>YDL044C</i>                                           | <i>MTF2</i>          | mitochondrial                    | 0.75             |                         |
| <i>YDR194C</i>                                           | <i>MSS116</i>        | mitochondrial                    | 0.75             |                         |
| <i>YFL036W</i>                                           | <i>RPO41</i>         | mitochondrial                    | 0.75             |                         |
| <i>YMR228W</i>                                           | <i>MTF1</i>          | mitochondrial                    | 1.00             |                         |
| <b>Respiratory chain components and assembly factors</b> |                      |                                  |                  |                         |
| <i>YAL039C</i>                                           | <i>CYC3</i>          | mitochondrial                    | 0.75             |                         |
| <i>YBL045C</i>                                           | <i>COR1</i>          | mitochondrial                    | 1.00             |                         |
| <i>YBL099W</i>                                           | <i>ATP1</i>          | mitochondrial                    | 1.00             |                         |
| <i>YBR037C</i>                                           | <i>SCO1</i>          | mitochondrial                    | 0.75             |                         |
| <i>YBR039W</i>                                           | <i>ATP3</i>          | mitochondrial                    | 1.00             |                         |
| <i>YDL067C</i>                                           | <i>COX9</i>          | mitochondrial                    | 1.00             |                         |
| <i>YDL107W</i>                                           | <i>MSS2</i>          | mitochondrial                    | 1.00             |                         |
| <i>YDR079W</i>                                           | <i>PET100</i>        | mitochondrial                    | 1.00             |                         |
| <i>YDR231C</i>                                           | <i>COX20</i>         | mitochondrial                    | 0.75             |                         |
| <i>YDR298C</i>                                           | <i>ATP5</i>          | mitochondrial                    | 1.00             |                         |
| <i>YDR375C</i>                                           | <i>BCS1</i>          | mitochondrial                    | 0.75             |                         |
| <i>YDR377W</i>                                           | <i>ATP17</i>         | mitochondrial                    | 1.00             |                         |
| <i>YDR529C</i>                                           | <i>QCR7</i>          | mitochondrial                    | 0.75             |                         |
| <i>YEL024W</i>                                           | <i>RIP1</i>          | mitochondrial                    | 1.00             |                         |
| <i>YER058W</i>                                           | <i>PET117</i>        | mitochondrial                    | 0.75             |                         |
| <i>YGR062C</i>                                           | <i>COX18</i>         | mitochondrial                    | 1.00             |                         |
| <i>YGR112W</i>                                           | <i>SHY1</i>          | mitochondrial                    | 1.00             |                         |
| <i>YGR174C</i>                                           | <i>CBP4</i>          | mitochondrial                    | 0.75             |                         |
| <i>YHR051W</i>                                           | <i>COX6</i>          | mitochondrial                    | 1.00             |                         |
| <i>YJL166W</i>                                           | <i>QCR8</i>          | mitochondrial                    | 0.75             |                         |
| <i>YJL180C</i>                                           | <i>ATP12</i>         | mitochondrial                    | 1.00             |                         |
| <i>YJR121W</i>                                           | <i>ATP2</i>          | mitochondrial                    | 0.75             |                         |
| <i>YKL016C</i>                                           | <i>ATP7</i>          | mitochondrial                    | 1.00             |                         |
| <i>YKL087C</i>                                           | <i>CYT2</i>          | mitochondrial                    | 0.75             |                         |
| <i>YKL148C</i>                                           | <i>SDH1</i>          | mitochondrial                    | 0.75             |                         |
| <i>YLL018C-A</i>                                         | <i>COX19</i>         | mitochondrial                    | 1.00             |                         |
| <i>YLL041C</i>                                           | <i>SDH2</i>          | mitochondrial                    | 0.75             |                         |
| <i>YLR038C</i>                                           | <i>COX12</i>         | mitochondrial                    | 1.00             |                         |
| <i>YLR393W</i>                                           | <i>ATP10</i>         | mitochondrial                    | 0.75             |                         |
| <i>YMR035W</i>                                           | <i>IMP2</i>          | mitochondrial                    | 0.75             |                         |
| <i>YMR150C</i>                                           | <i>IMP1</i>          | mitochondrial                    | 1.00             |                         |
| <i>YMR256C</i>                                           | <i>COX7</i>          | mitochondrial                    | 1.00             |                         |
| <i>YNL052W</i>                                           | <i>COX5A</i>         | mitochondrial                    | 1.00             |                         |
| <i>YNL315C</i>                                           | <i>ATP11</i>         | mitochondrial                    | 1.00             |                         |
| <i>YOL071W</i>                                           | <i>SDH5</i>          | mitochondrial                    | 0.75             |                         |
| <i>YOR065W</i>                                           | <i>CYT1</i>          | mitochondrial                    | 1.00             |                         |
| <i>YPL078C</i>                                           | <i>ATP4</i>          | mitochondrial                    | 1.00             |                         |
| <i>YPL132W</i>                                           | <i>COX11</i>         | mitochondrial                    | 0.75             |                         |
| <i>YPL172C</i>                                           | <i>COX10</i>         | mitochondrial                    | 1.00             |                         |

| <b>ORF</b>                          | <b>standard name</b> | <b>Morgenstern et al. (2017)</b> | <b>pet score</b> | <b>overlapping ORFs</b> |
|-------------------------------------|----------------------|----------------------------------|------------------|-------------------------|
| <i>YPL215W</i>                      | <i>CBP3</i>          | mitochondrial                    | 0.75             |                         |
| <i>YPL271W</i>                      | <i>ATP15</i>         | mitochondrial                    | 1.00             |                         |
| <i>YPR191W</i>                      | <i>QCR2</i>          | mitochondrial                    | 0.75             |                         |
| <b>mtDNA metabolism</b>             |                      |                                  |                  |                         |
| <i>YCR028C-A</i>                    | <i>RIM1</i>          | mitochondrial                    | 1.00             |                         |
| <i>YHR120W</i>                      | <i>MSH1</i>          | mitochondrial                    | 1.00             |                         |
| <i>YJR144W</i>                      | <i>MGM101</i>        | mitochondrial                    | 1.00             |                         |
| <i>YML061C</i>                      | <i>PIF1</i>          | mitochondrial                    | 0.75             |                         |
| <i>YMR072W</i>                      | <i>ABF2</i>          | mitochondrial                    | 1.00             |                         |
| <i>YOL095C</i>                      | <i>HMI1</i>          | mitochondrial                    | 0.75             |                         |
| <i>YOR330C</i>                      | <i>MIP1</i>          | mitochondrial                    | 1.00             |                         |
| <b>Other mitochondrial proteins</b> |                      |                                  |                  |                         |
| <i>YAL044C</i>                      | <i>GCV3</i>          | mitochondrial                    | 1.00             |                         |
| <i>YBR003W</i>                      | <i>COQ1</i>          | mitochondrial                    | 1.00             |                         |
| <i>YBR026C</i>                      | <i>ETR1</i>          | mitochondrial                    | 1.00             |                         |
| <i>YBR179C</i>                      | <i>FZO1</i>          | mitochondrial                    | 0.75             |                         |
| <i>YDL198C</i>                      | <i>GGC1</i>          | mitochondrial                    | 0.75             |                         |
| <i>YDR148C</i>                      | <i>KGD2</i>          | mitochondrial                    | 1.00             |                         |
| <i>YDR204W</i>                      | <i>COQ4</i>          | mitochondrial                    | 0.75             |                         |
| <i>YEL059C-A</i>                    | <i>SOM1</i>          | mitochondrial                    | 0.67             |                         |
| <i>YER014W</i>                      | <i>HEM14</i>         | mitochondrial                    | 0.67             |                         |
| <i>YER017C</i>                      | <i>AFG3</i>          | mitochondrial                    | 0.75             |                         |
| <i>YER061C</i>                      | <i>CEM1</i>          | mitochondrial                    | 1.00             |                         |
| <i>YER145C</i>                      | <i>FTR1</i>          | mitochondrial                    | 0.75             |                         |
| <i>YER154W</i>                      | <i>OXA1</i>          | mitochondrial                    | 1.00             |                         |
| <i>YFL016C</i>                      | <i>MDJ1</i>          | mitochondrial                    | 1.00             |                         |
| <i>YFL018C</i>                      | <i>LPD1</i>          | mitochondrial                    | 0.75             |                         |
| <i>YGR255C</i>                      | <i>COQ6</i>          | mitochondrial                    | 0.75             |                         |
| <i>YHR067W</i>                      | <i>HTD2</i>          | mitochondrial                    | 1.00             |                         |
| <i>YJL046W</i>                      | <i>AIM22</i>         | mitochondrial                    | 1.00             |                         |
| <i>YJR122W</i>                      | <i>IBA57</i>         | mitochondrial                    | 1.00             |                         |
| <i>YKLO40C</i>                      | <i>NFU1</i>          | mitochondrial                    | 0.75             |                         |
| <i>YKLO55C</i>                      | <i>OAR1</i>          | mitochondrial                    | 0.75             |                         |
| <i>YKL134C</i>                      | <i>OCT1</i>          | mitochondrial                    | 1.00             |                         |
| <i>YLL027W</i>                      | <i>ISA1</i>          | mitochondrial                    | 1.00             |                         |
| <i>YLR201C</i>                      | <i>COQ9</i>          | mitochondrial                    | 0.75             |                         |
| <i>YLR239C</i>                      | <i>LIP2</i>          | mitochondrial                    | 0.75             |                         |
| <i>YLR304C</i>                      | <i>ACO1</i>          | mitochondrial                    | 0.75             |                         |
| <i>YLR369W</i>                      | <i>SSQ1</i>          | mitochondrial                    | 0.75             |                         |
| <i>YML110C</i>                      | <i>COQ5</i>          | mitochondrial                    | 0.75             |                         |
| <i>YMR089C</i>                      | <i>YTA12</i>         | mitochondrial                    | 1.00             |                         |
| <i>YMR267W</i>                      | <i>PPA2</i>          | mitochondrial                    | 1.00             |                         |
| <i>YMR287C</i>                      | <i>DSS1</i>          | mitochondrial                    | 0.75             |                         |
| <i>YNR041C</i>                      | <i>COQ2</i>          | mitochondrial                    | 1.00             |                         |
| <i>YOL008W</i>                      | <i>COQ10</i>         | mitochondrial                    | 0.75             |                         |
| <i>YOL096C</i>                      | <i>COQ3</i>          | mitochondrial                    | 0.75             |                         |
| <i>YOR125C</i>                      | <i>CAT5</i>          | mitochondrial                    | 0.75             |                         |
| <i>YOR211C</i>                      | <i>MGM1</i>          | mitochondrial                    | 1.00             |                         |
| <i>YOR221C</i>                      | <i>MCT1</i>          | mitochondrial                    | 0.75             |                         |

| ORF                             | standard name | Morgenstern et al. (2017) | pet score | overlapping ORFs                                      |
|---------------------------------|---------------|---------------------------|-----------|-------------------------------------------------------|
| YOR241W                         | MET7          | mitochondrial             | 1.00      |                                                       |
| YPL029W                         | SUV3          | mitochondrial             | 0.75      |                                                       |
| YPL059W                         | GRX5          | mitochondrial             | 0.75      |                                                       |
| YPL148C                         | PPT2          | mitochondrial             | 0.75      |                                                       |
| YPL262W                         | FUM1          | mitochondrial             | 0.75      |                                                       |
| YPR067W                         | ISA2          | mitochondrial             | 1.00      |                                                       |
| <b>Vacuole-related function</b> |               |                           |           |                                                       |
| YCL005W-A                       | VMA9          |                           | 1.00      |                                                       |
| YDL185W                         | VMA1          |                           | 1.00      |                                                       |
| YEL027W                         | VMA3          |                           | 0.75      |                                                       |
| YEL051W                         | VMA8          |                           | 0.75      |                                                       |
| YGR105W                         | VMA21         |                           | 1.00      |                                                       |
| YHR026W                         | VMA16         |                           | 0.75      |                                                       |
| YHR039C-A                       | VMA10         |                           | 0.75      |                                                       |
| YHR060W                         | VMA22         |                           | 0.75      |                                                       |
| YKL002W                         | DID4          |                           | 0.75      |                                                       |
| YKL080W                         | VMA5          |                           | 1.00      |                                                       |
| YLR396C                         | VPS33         |                           | 0.75      |                                                       |
| YLR447C                         | VMA6          |                           | 1.00      |                                                       |
| YOR332W                         | VMA4          |                           | 0.75      |                                                       |
| YPL045W                         | VPS16         |                           | 0.75      |                                                       |
| YPL234C                         | VMA11         |                           | 0.75      |                                                       |
| <b>Other proteins</b>           |               |                           |           |                                                       |
| YAL012W                         | CYS3          |                           | 0.75      |                                                       |
| YAL016W                         | TPD3          |                           | 0.75      |                                                       |
| YBL021C                         | HAP3          |                           | 0.75      |                                                       |
| YDR477W                         | SNF1          |                           | 0.75      |                                                       |
| YER014C-A                       | BUD25         |                           | 0.75      | HEM14 (pet score: 0.67) and<br>FAA2 (pet score: 0.00) |
| YGL070C                         | RPB9          |                           | 0.75      |                                                       |
| YGL071W                         | AFT1          |                           | 1.00      |                                                       |
| YGL115W                         | SNF4          |                           | 0.75      |                                                       |
| YGL135W                         | RPL1B         |                           | 0.75      |                                                       |
| YGL237C                         | HAP2          |                           | 0.75      |                                                       |
| YGL240W                         | DOC1          |                           | 0.75      |                                                       |
| YGR180C                         | RNR4          |                           | 1.00      |                                                       |
| YJL176C                         | SWI3          |                           | 1.00      |                                                       |
| YJR090C                         | GRR1          |                           | 0.75      |                                                       |
| YKL054C                         | DEF1          |                           | 0.75      |                                                       |
| YKL109W                         | HAP4          |                           | 1.00      |                                                       |
| YLR240W                         | VPS34         |                           | 0.75      |                                                       |
| YLR260W                         | LCB5          |                           | 0.75      |                                                       |
| YLR377C                         | FBP1          |                           | 0.75      |                                                       |
| YMR021C                         | MAC1          |                           | 0.75      |                                                       |
| YOR358W                         | HAP5          |                           | 1.00      |                                                       |
| YPR124W                         | CTR1          |                           | 0.75      |                                                       |
| <b>Unknown function</b>         |               |                           |           |                                                       |
| YDR065W                         | RRG1          | mitochondrial             | 1.00      |                                                       |
| YDR114C                         |               |                           | 1.00      | MRX14 (pet score: 0.75)                               |

| ORF                 | standard name | Morgenstern et al. (2017) | <i>pet</i> score | overlapping ORFs                                                                    |
|---------------------|---------------|---------------------------|------------------|-------------------------------------------------------------------------------------|
| <i>YLL033W</i>      | <i>IRC19</i>  | mitochondrial             | 0.75             |                                                                                     |
| <i>YMR066W</i>      | <i>SOV1</i>   | mitochondrial             | 0.75             |                                                                                     |
| <i>YNL184C</i>      |               |                           | 1.00             | <i>MRPL19</i> ( <i>pet</i> score: 1.00)                                             |
| <i>YNL213C</i>      | <i>RRG9</i>   | mitochondrial             | 1.00             |                                                                                     |
| <i>YOR305W</i>      | <i>RRG7</i>   | mitochondrial             | 1.00             |                                                                                     |
| <b>Dubious ORFs</b> |               |                           |                  |                                                                                     |
| <i>YBL100C</i>      |               |                           | 0.75             | <i>ATP1</i> ( <i>pet</i> score: 1.00)                                               |
| <i>YCL007C</i>      |               |                           | 1.00             | <i>VMA9</i> ( <i>pet</i> score: 1.00)                                               |
| <i>YDL068W</i>      |               |                           | 0.75             | <i>CBS1</i> ( <i>pet</i> score: 0.75)                                               |
| <i>YDR230W</i>      |               |                           | 1.00             | <i>COX20</i> ( <i>pet</i> score: 0.75)                                              |
| <i>YGL218W</i>      |               |                           | 0.75             | <i>MDM34</i> ( <i>pet</i> score: 0.00)                                              |
| <i>YGR219W</i>      |               |                           | 0.75             | <i>MRPL9</i> ( <i>pet</i> score: 1.00)                                              |
| <i>YJL120W</i>      |               |                           | 0.75             | <i>RPE1</i> ( <i>pet</i> score: 0.50)                                               |
| <i>YJR114W</i>      |               |                           | 1.00             | <i>RSM7</i> ( <i>pet</i> score: 1.00)                                               |
| <i>YKL169C</i>      |               |                           | 1.00             | <i>MRPL38</i> ( <i>pet</i> score: 1.00)                                             |
| <i>YLR202C</i>      |               |                           | 1.00             | <i>MSS51</i> ( <i>pet</i> score: 1.00) and<br><i>COQ9</i> ( <i>pet</i> score: 0.75) |
| <i>YNL170W</i>      |               |                           | 0.75             | <i>PSD1</i> ( <i>pet</i> score: 0.00)                                               |
| <i>YOR200W</i>      |               |                           | 1.00             | <i>MRM1</i> ( <i>pet</i> score: 0.50)                                               |
| <i>YOR331C</i>      |               |                           | 1.00             | <i>VMA4</i> ( <i>pet</i> score: 0.75)                                               |
| <i>YPR099C</i>      |               |                           | 0.75             | <i>MRPL51</i> ( <i>pet</i> score: 0.75)                                             |



**Table S3.** Results of the cytoduction screen. This table contains the systematic gene name according to SGD, the standard gene name according to SGD, and the *pet* score. Class I mutants showed a *pet* phenotype before and after cytoduction, class II mutants showed a *pet* phenotype only before cytoduction and were rescued by replenishment of intact mtDNA, and class III mutants acquired a *pet* phenotype only after cytoduction. It is indicated whether this behavior was reproduced in an independent experiment.

Stenger et al. - Table S3

| ORF       | standard name | pet score | reproducible | class   |
|-----------|---------------|-----------|--------------|---------|
| YAL016W   | TPD3          | 0.75      | no           | class I |
| YBL022C   | PIM1          | 0.50      | yes          | class I |
| YBL038W   | MRPL16        | 0.75      | yes          | class I |
| YBL045C   | COR1          | 1.00      | yes          | class I |
| YBL080C   | PET112        | 0.75      | no           | class I |
| YBL090W   | MRP21         | 1.00      | yes          | class I |
| YBR003W   | COQ1          | 1.00      | yes          | class I |
| YBR037C   | SCO1          | 0.75      | yes          | class I |
| YBR120C   | CBP6          | 0.50      | yes          | class I |
| YBR179C   | FZO1          | 0.75      | yes          | class I |
| YBR251W   | MRPS5         | 0.75      | yes          | class I |
| YBR268W   | MRPL37        | 0.75      | yes          | class I |
| YBR282W   | MRPL27        | 1.00      | yes          | class I |
| YCL005W-A | VMA9          | 1.00      | yes          | class I |
| YCL007C   |               | 1.00      | yes          | class I |
| YCR003W   | MRPL32        | 1.00      | yes          | class I |
| YCR024C   | SLM5          | 1.00      | yes          | class I |
| YCR028C-A | RIM1          | 1.00      | yes          | class I |
| YCR071C   | IMG2          | 1.00      | yes          | class I |
| YDL067C   | COX9          | 1.00      | yes          | class I |
| YDL069C   | CBS1          | 0.75      | yes          | class I |
| YDL072C   | YET3          | 0.25      | no           | class I |
| YDL107W   | MSS2          | 1.00      | yes          | class I |
| YDL167C   | NRP1          | 0.50      | yes          | class I |
| YDL185W   | VMA1          | 1.00      | yes          | class I |
| YDL198C   | GGC1          | 0.75      | yes          | class I |
| YDL202W   | MRPL11        | 0.75      | yes          | class I |
| YDR065W   | RRG1          | 1.00      | yes          | class I |
| YDR079C-A | TFB5          | 0.33      | no           | class I |
| YDR079W   | PET100        | 1.00      | yes          | class I |
| YDR114C   |               | 1.00      | yes          | class I |
| YDR138W   | HPR1          | 0.25      | yes          | class I |
| YDR148C   | KGD2          | 1.00      | yes          | class I |
| YDR175C   | RSM24         | 1.00      | yes          | class I |
| YDR230W   |               | 1.00      | yes          | class I |
| YDR231C   | COX20         | 0.75      | yes          | class I |
| YDR268W   | MSW1          | 0.75      | yes          | class I |
| YDR298C   | ATP5          | 1.00      | yes          | class I |
| YDR300C   | PRO1          | 0.25      | yes          | class I |
| YDR322W   | MRPL35        | 0.50      | yes          | class I |
| YDR347W   | MRP1          | 0.75      | yes          | class I |
| YDR350C   | ATP22         | 0.75      | yes          | class I |
| YDR375C   | BCS1          | 0.75      | yes          | class I |
| YDR377W   | ATP17         | 1.00      | yes          | class I |
| YDR405W   | MRP20         | 0.75      | yes          | class I |
| YDR470C   | UGO1          | 0.25      | yes          | class I |
| YDR477W   | SNF1          | 0.75      | no           | class I |
| YDR529C   | QCR7          | 0.75      | yes          | class I |

| <b>ORF</b> | <b>standard name</b> | <b>pet score</b> | <b>reproducible</b> | <b>class</b> |
|------------|----------------------|------------------|---------------------|--------------|
| YEL024W    | RIP1                 | 1.00             | yes                 | class I      |
| YEL050C    | RML2                 | 0.75             | yes                 | class I      |
| YEL059C-A  | SOM1                 | 0.67             | yes                 | class I      |
| YER014W    | HEM14                | 0.67             | yes                 | class I      |
| YER050C    | RSM18                | 1.00             | yes                 | class I      |
| YER058W    | PET117               | 0.75             | yes                 | class I      |
| YER087W    | AIM10                | 1.00             | yes                 | class I      |
| YER153C    | PET122               | 0.75             | yes                 | class I      |
| YER154W    | OXA1                 | 1.00             | yes                 | class I      |
| YFL016C    | MDJ1                 | 1.00             | yes                 | class I      |
| YFL018C    | LPD1                 | 0.75             | no                  | class I      |
| YFL036W    | RPO41                | 0.75             | yes                 | class I      |
| YGL071W    | AFT1                 | 1.00             | no                  | class I      |
| YGL095C    | VPS45                | 0.50             | no                  | class I      |
| YGL119W    | COQ8                 | 0.33             | yes                 | class I      |
| YGL129C    | RSM23                | 1.00             | yes                 | class I      |
| YGL143C    | MRF1                 | 1.00             | yes                 | class I      |
| YGR062C    | COX18                | 1.00             | yes                 | class I      |
| YGR101W    | PCP1                 | 0.50             | yes                 | class I      |
| YGR105W    | VMA21                | 1.00             | yes                 | class I      |
| YGR112W    | SHY1                 | 1.00             | yes                 | class I      |
| YGR150C    | CCM1                 | 1.00             | yes                 | class I      |
| YGR165W    | MRPS35               | 0.50             | yes                 | class I      |
| YGR180C    | RNR4                 | 1.00             | no                  | class I      |
| YGR215W    | RSM27                | 1.00             | yes                 | class I      |
| YGR219W    |                      | 0.75             | yes                 | class I      |
| YGR220C    | MRPL9                | 1.00             | yes                 | class I      |
| YGR222W    | PET54                | 1.00             | yes                 | class I      |
| YGR255C    | COQ6                 | 0.75             | yes                 | class I      |
| YGR257C    | MTM1                 | 0.50             | yes                 | class I      |
| YHL004W    | MRP4                 | 1.00             | no                  | class I      |
| YHL038C    | CBP2                 | 1.00             | yes                 | class I      |
| YHR011W    | DIA4                 | 1.00             | yes                 | class I      |
| YHR026W    | VMA16                | 0.75             | yes                 | class I      |
| YHR051W    | COX6                 | 1.00             | yes                 | class I      |
| YHR067W    | HTD2                 | 1.00             | no                  | class I      |
| YHR091C    | MSR1                 | 1.00             | yes                 | class I      |
| YHR116W    | COX23                | 0.50             | yes                 | class I      |
| YHR147C    | MRPL6                | 1.00             | yes                 | class I      |
| YJL023C    | PET130               | 0.50             | yes                 | class I      |
| YJL046W    | AIM22                | 1.00             | yes                 | class I      |
| YJL096W    | MRPL49               | 1.00             | yes                 | class I      |
| YJL166W    | QCR8                 | 0.75             | yes                 | class I      |
| YJL176C    | SWI3                 | 1.00             | yes                 | class I      |
| YJL184W    | GON7                 | 0.50             | no                  | class I      |
| YJL209W    | CBP1                 | 0.75             | yes                 | class I      |
| YJR090C    | GRR1                 | 0.75             | yes                 | class I      |
| YJR113C    | RSM7                 | 1.00             | yes                 | class I      |
| YJR114W    |                      | 1.00             | yes                 | class I      |

| <b>ORF</b> | <b>standard name</b> | <b>pet score</b> | <b>reproducible</b> | <b>class</b> |
|------------|----------------------|------------------|---------------------|--------------|
| YJR120W    |                      | 0.50             | yes                 | class I      |
| YJR122W    | IBA57                | 1.00             | yes                 | class I      |
| YJR144W    | MGM101               | 1.00             | yes                 | class I      |
| YKL003C    | MRP17                | 1.00             | yes                 | class I      |
| YKL016C    | ATP7                 | 1.00             | yes                 | class I      |
| YKL080W    | VMA5                 | 1.00             | yes                 | class I      |
| YKL109W    | HAP4                 | 1.00             | no                  | class I      |
| YKL134C    | OCT1                 | 1.00             | yes                 | class I      |
| YKL148C    | SDH1                 | 0.75             | no                  | class I      |
| YKL155C    | RSM22                | 1.00             | yes                 | class I      |
| YKL169C    |                      | 1.00             | yes                 | class I      |
| YKL170W    | MRPL38               | 1.00             | yes                 | class I      |
| YKL194C    | MST1                 | 1.00             | yes                 | class I      |
| YKR006C    | MRPL13               | 1.00             | yes                 | class I      |
| YLL018C-A  | COX19                | 1.00             | yes                 | class I      |
| YLL027W    | ISA1                 | 1.00             | yes                 | class I      |
| YLR038C    | COX12                | 1.00             | yes                 | class I      |
| YLR067C    | PET309               | 1.00             | yes                 | class I      |
| YLR139C    | SLS1                 | 1.00             | yes                 | class I      |
| YLR201C    | COQ9                 | 0.75             | yes                 | class I      |
| YLR202C    |                      | 1.00             | yes                 | class I      |
| YLR203C    | MSS51                | 1.00             | yes                 | class I      |
| YLR239C    | LIP2                 | 0.75             | yes                 | class I      |
| YLR240W    | VPS34                | 0.75             | yes                 | class I      |
| YLR312W-A  | MRPL15               | 1.00             | yes                 | class I      |
| YLR368W    | MDM30                | 0.25             | yes                 | class I      |
| YLR396C    | VPS33                | 0.75             | yes                 | class I      |
| YLR447C    | VMA6                 | 1.00             | yes                 | class I      |
| YML110C    | COQ5                 | 0.75             | yes                 | class I      |
| YMR021C    | MAC1                 | 0.75             | yes                 | class I      |
| YMR035W    | IMP2                 | 0.75             | yes                 | class I      |
| YMR064W    | AEP1                 | 1.00             | yes                 | class I      |
| YMR066W    | SOV1                 | 0.75             | yes                 | class I      |
| YMR098C    | ATP25                | 1.00             | yes                 | class I      |
| YMR150C    | IMP1                 | 1.00             | yes                 | class I      |
| YMR228W    | MTF1                 | 1.00             | yes                 | class I      |
| YMR256C    | COX7                 | 1.00             | yes                 | class I      |
| YMR257C    | PET111               | 1.00             | yes                 | class I      |
| YMR267W    | PPA2                 | 1.00             | yes                 | class I      |
| YMR286W    | MRPL33               | 1.00             | yes                 | class I      |
| YMR293C    | HER2                 | 1.00             | yes                 | class I      |
| YNL005C    | MRP7                 | 1.00             | yes                 | class I      |
| YNL073W    | MSK1                 | 1.00             | yes                 | class I      |
| YNL081C    | SWS2                 | 1.00             | yes                 | class I      |
| YNL177C    | MRPL22               | 1.00             | yes                 | class I      |
| YNL184C    |                      | 1.00             | yes                 | class I      |
| YNL213C    | RRG9                 | 1.00             | yes                 | class I      |
| YNL284C    | MRPL10               | 0.75             | yes                 | class I      |
| YNR036C    | MRPS12               | 0.75             | yes                 | class I      |

| <b>ORF</b> | <b>standard name</b> | <b>pet score</b> | <b>reproducible</b> | <b>class</b> |
|------------|----------------------|------------------|---------------------|--------------|
| YNR037C    | RSM19                | 1.00             | yes                 | class I      |
| YNR041C    | COQ2                 | 1.00             | yes                 | class I      |
| YNR045W    | PET494               | 0.75             | yes                 | class I      |
| YOL033W    | MSE1                 | 1.00             | yes                 | class I      |
| YOL071W    | SDH5                 | 0.75             | yes                 | class I      |
| YOL096C    | COQ3                 | 0.75             | yes                 | class I      |
| YOR065W    | CYT1                 | 1.00             | yes                 | class I      |
| YOR125C    | CAT5                 | 0.75             | yes                 | class I      |
| YOR150W    | MRPL23               | 1.00             | yes                 | class I      |
| YOR158W    | PET123               | 1.00             | yes                 | class I      |
| YOR187W    | TUF1                 | 1.00             | yes                 | class I      |
| YOR199W    |                      | 0.50             | no                  | class I      |
| YOR200W    |                      | 1.00             | yes                 | class I      |
| YOR201C    | MRM1                 | 0.50             | yes                 | class I      |
| YOR205C    | GEP3                 | 0.75             | yes                 | class I      |
| YOR211C    | MGM1                 | 1.00             | yes                 | class I      |
| YOR330C    | MIP1                 | 1.00             | yes                 | class I      |
| YOR331C    |                      | 1.00             | yes                 | class I      |
| YOR350C    | MNE1                 | 0.75             | yes                 | class I      |
| YOR358W    | HAP5                 | 1.00             | yes                 | class I      |
| YPL005W    | AEP3                 | 0.75             | yes                 | class I      |
| YPL013C    | MRPS16               | 1.00             | yes                 | class I      |
| YPL029W    | SUV3                 | 0.75             | yes                 | class I      |
| YPL059W    | GRX5                 | 0.75             | yes                 | class I      |
| YPL078C    | ATP4                 | 1.00             | yes                 | class I      |
| YPL097W    | MSY1                 | 1.00             | yes                 | class I      |
| YPL118W    | MRP51                | 0.75             | yes                 | class I      |
| YPL172C    | COX10                | 1.00             | yes                 | class I      |
| YPL173W    | MRPL40               | 1.00             | yes                 | class I      |
| YPL262W    | FUM1                 | 0.75             | yes                 | class I      |
| YPL271W    | ATP15                | 1.00             | yes                 | class I      |
| YPR047W    | MSF1                 | 0.75             | yes                 | class I      |
| YPR066W    | UBA3                 | 0.50             | no                  | class I      |
| YPR067W    | ISA2                 | 1.00             | yes                 | class I      |
| YPR100W    | MRPL51               | 0.75             | yes                 | class I      |
| YPR116W    | RRG8                 | 1.00             | yes                 | class I      |
| YPR124W    | CTR1                 | 0.75             | yes                 | class I      |
| YAL012W    | CYS3                 | 0.75             | yes                 | class II     |
| YAL044C    | GCV3                 | 1.00             | yes                 | class II     |
| YAL048C    | GEM1                 | 0.50             | yes                 | class II     |
| YBL002W    | HTB2                 | 0.50             | yes                 | class II     |
| YBL044W    |                      | 0.50             | yes                 | class II     |
| YBR026C    | ETR1                 | 1.00             | yes                 | class II     |
| YBR122C    | MRPL36               | 1.00             | yes                 | class II     |
| YCR004C    | YCP4                 | 0.50             | yes                 | class II     |
| YCR046C    | IMG1                 | 1.00             | no                  | class II     |
| YDL032W    |                      | 0.50             | yes                 | class II     |
| YDL040C    | NAT1                 | 0.25             | yes                 | class II     |
| YDL063C    | SYO1                 | 0.50             | yes                 | class II     |

| <b>ORF</b> | <b>standard name</b> | <b>pet score</b> | <b>reproducible</b> | <b>class</b> |
|------------|----------------------|------------------|---------------------|--------------|
| YDL133C-A  | RPL41B               | 0.25             | yes                 | class II     |
| YDL146W    | LDB17                | 0.50             | yes                 | class II     |
| YDL206W    |                      | 0.25             | yes                 | class II     |
| YDR042C    |                      | 0.50             | yes                 | class II     |
| YDR078C    | SHU2                 | 0.50             | yes                 | class II     |
| YDR116C    | MRPL1                | 0.50             | yes                 | class II     |
| YDR178W    | SDH4                 | 0.25             | yes                 | class II     |
| YDR493W    | MZM1                 | 0.25             | yes                 | class II     |
| YDR507C    | GIN4                 | 0.50             | yes                 | class II     |
| YDR512C    | EMI1                 | 0.50             | yes                 | class II     |
| YDR518W    | EUG1                 | 0.50             | yes                 | class II     |
| YDR521W    |                      | 0.25             | yes                 | class II     |
| YDR523C    | SPS1                 | 0.50             | yes                 | class II     |
| YEL036C    | ANP1                 | 0.25             | yes                 | class II     |
| YER061C    | CEM1                 | 1.00             | yes                 | class II     |
| YER103W    | SSA4                 | 0.50             | yes                 | class II     |
| YER110C    | KAP123               | 0.50             | yes                 | class II     |
| YER122C    | GLO3                 | 0.50             | yes                 | class II     |
| YER169W    | RPH1                 | 0.50             | yes                 | class II     |
| YFR048W    | RMD8                 | 0.25             | yes                 | class II     |
| YGL084C    | GUP1                 | 0.25             | yes                 | class II     |
| YGL107C    | RMD9                 | 0.75             | no                  | class II     |
| YGL115W    | SNF4                 | 0.75             | yes                 | class II     |
| YGL198W    | YIP4                 | 0.25             | yes                 | class II     |
| YGL220W    | BOL2                 | 0.50             | yes                 | class II     |
| YGL240W    | DOC1                 | 0.75             | yes                 | class II     |
| YGR157W    | CHO2                 | 0.25             | yes                 | class II     |
| YGR174C    | CBP4                 | 0.75             | yes                 | class II     |
| YGR183C    | QCR9                 | 0.50             | yes                 | class II     |
| YHR050W-A  |                      | 0.33             | yes                 | class II     |
| YHR120W    | MSH1                 | 1.00             | yes                 | class II     |
| YHR175W-A  |                      | 0.33             | yes                 | class II     |
| YIL012W    |                      | 0.25             | yes                 | class II     |
| YIL041W    | GVP36                | 0.25             | yes                 | class II     |
| YJL027C    |                      | 0.25             | yes                 | class II     |
| YJR004C    | SAG1                 | 0.50             | yes                 | class II     |
| YJR060W    | CBF1                 | 0.25             | yes                 | class II     |
| YJR150C    | DAN1                 | 0.25             | yes                 | class II     |
| YKL002W    | DID4                 | 0.75             | no                  | class II     |
| YKL040C    | NFU1                 | 0.75             | yes                 | class II     |
| YKL054C    | DEF1                 | 0.75             | yes                 | class II     |
| YKL087C    | CYT2                 | 0.75             | yes                 | class II     |
| YKL137W    | CMC1                 | 0.50             | yes                 | class II     |
| YKL208W    | CBT1                 | 0.50             | no                  | class II     |
| YKL212W    | SAC1                 | 0.50             | yes                 | class II     |
| YLL006W    | MMM1                 | 0.50             | yes                 | class II     |
| YLL041C    | SDH2                 | 0.75             | yes                 | class II     |
| YLR114C    | AVL9                 | 0.50             | yes                 | class II     |
| YLR200W    | YKE2                 | 0.25             | yes                 | class II     |

| <b>ORF</b> | <b>standard name</b> | <b>pet score</b> | <b>reproducible</b> | <b>class</b> |
|------------|----------------------|------------------|---------------------|--------------|
| YLR204W    | QRI5                 | 0.50             | yes                 | class II     |
| YLR288C    | MEC3                 | 0.25             | yes                 | class II     |
| YLR369W    | SSQ1                 | 0.75             | yes                 | class II     |
| YLR377C    | FBP1                 | 0.75             | yes                 | class II     |
| YLR393W    | ATP10                | 0.75             | yes                 | class II     |
| YML088W    | UFO1                 | 0.50             | yes                 | class II     |
| YMR063W    | RIM9                 | 0.50             | yes                 | class II     |
| YMR067C    | UBX4                 | 0.50             | yes                 | class II     |
| YMR071C    | TVP18                | 0.50             | yes                 | class II     |
| YMR072W    | ABF2                 | 1.00             | yes                 | class II     |
| YMR084W    |                      | 0.50             | yes                 | class II     |
| YMR089C    | YTA12                | 1.00             | yes                 | class II     |
| YMR184W    | ADD37                | 0.50             | yes                 | class II     |
| YMR207C    | HFA1                 | 0.50             | yes                 | class II     |
| YNL052W    | COX5A                | 1.00             | no                  | class II     |
| YNL133C    | FYV6                 | 0.25             | yes                 | class II     |
| YNL160W    | YGP1                 | 0.50             | yes                 | class II     |
| YNL162W    | RPL42A               | 0.50             | yes                 | class II     |
| YNL170W    |                      | 0.75             | yes                 | class II     |
| YNL225C    | CNM67                | 0.50             | yes                 | class II     |
| YNR020C    | ATP23                | 0.50             | yes                 | class II     |
| YOL008W    | COQ10                | 0.75             | yes                 | class II     |
| YOL023W    | IFM1                 | 0.75             | yes                 | class II     |
| YOL100W    | PKH2                 | 0.50             | yes                 | class II     |
| YOR026W    | BUB3                 | 0.25             | yes                 | class II     |
| YOR037W    | CYC2                 | 0.50             | yes                 | class II     |
| YOR241W    | MET7                 | 1.00             | yes                 | class II     |
| YOR290C    | SNF2                 | 0.50             | yes                 | class II     |
| YOR295W    | UAF30                | 0.25             | yes                 | class II     |
| YOR305W    | RRG7                 | 1.00             | yes                 | class II     |
| YPL159C    | PET20                | 0.25             | yes                 | class II     |
| YAL047C    | SPC72                | 0.50             | no                  | class III    |
| YBL021C    | HAP3                 | 0.75             | yes                 | class III    |
| YBR018C    | GAL7                 | 0.00             | yes                 | class III    |
| YBR019C    | GAL10                | 0.00             | yes                 | class III    |
| YBR020W    | GAL1                 | 0.00             | yes                 | class III    |
| YBR036C    | CSG2                 | 0.25             | no                  | class III    |
| YBR097W    | VPS15                | 0.33             | yes                 | class III    |
| YCR053W    | THR4                 | 0.00             | yes                 | class III    |
| YCR095W-A  |                      | 0.00             | no                  | class III    |
| YDL041W    |                      | 0.00             | yes                 | class III    |
| YDL042C    | SIR2                 | 0.00             | yes                 | class III    |
| YDL090C    | RAM1                 | 0.00             | yes                 | class III    |
| YDL160C-A  | MHF2                 | 0.00             | yes                 | class III    |
| YDR005C    | MAF1                 | 0.00             | no                  | class III    |
| YDR076W    | RAD55                | 0.00             | no                  | class III    |
| YDR103W    | STE5                 | 0.00             | yes                 | class III    |
| YDR126W    | SWF1                 | 0.00             | no                  | class III    |
| YDR227W    | SIR4                 | 0.00             | yes                 | class III    |

| <b>ORF</b> | <b>standard name</b> | <b>pet score</b> | <b>reproducible</b> | <b>class</b> |
|------------|----------------------|------------------|---------------------|--------------|
| YDR269C    |                      | 0.25             | no                  | class III    |
| YDR270W    | CCC2                 | 0.50             | yes                 | class III    |
| YDR296W    | MHR1                 | 0.75             | yes                 | class III    |
| YDR461W    | MFA1                 | 0.00             | yes                 | class III    |
| YEL004W    | YEA4                 | 0.00             | yes                 | class III    |
| YEL029C    | BUD16                | 0.25             | yes                 | class III    |
| YEL051W    | VMA8                 | 0.75             | yes                 | class III    |
| YEL072W    | RMD6                 | 0.00             | no                  | class III    |
| YER052C    | HOM3                 | 0.00             | no                  | class III    |
| YFL026W    | STE2                 | 0.00             | yes                 | class III    |
| YGL012W    | ERG4                 | 0.00             | no                  | class III    |
| YGL156W    | AMS1                 | 0.00             | yes                 | class III    |
| YGL168W    | HUR1                 | 0.00             | no                  | class III    |
| YGL206C    | CHC1                 | 0.50             | yes                 | class III    |
| YGR262C    | BUD32                | 0.25             | no                  | class III    |
| YHL007C    | STE20                | 0.00             | no                  | class III    |
| YHR005C    | GPA1                 | 0.00             | yes                 | class III    |
| YHR010W    | RPL27A               | 0.00             | no                  | class III    |
| YHR013C    | ARD1                 | 0.00             | no                  | class III    |
| YHR018C    | ARG4                 | 0.00             | no                  | class III    |
| YHR030C    | SLT2                 | 0.00             | yes                 | class III    |
| YHR130C    |                      | 0.00             | no                  | class III    |
| YHR177W    | ROF1                 | 0.00             | yes                 | class III    |
| YIL084C    | SDS3                 | 0.00             | yes                 | class III    |
| YIR009W    | MSL1                 | 0.00             | no                  | class III    |
| YIR034C    | LYS1                 | 0.00             | no                  | class III    |
| YJL088W    | ARG3                 | 0.00             | no                  | class III    |
| YJL094C    | KHA1                 | 0.00             | no                  | class III    |
| YJL095W    | BCK1                 | 0.00             | yes                 | class III    |
| YJR005C-A  | LSO1                 | 0.00             | yes                 | class III    |
| YJR040W    | GEF1                 | 0.50             | no                  | class III    |
| YJR086W    | STE18                | 0.00             | yes                 | class III    |
| YKL135C    | APL2                 | 0.00             | yes                 | class III    |
| YLR023C    | IZH3                 | 0.00             | no                  | class III    |
| YLR027C    | AAT2                 | 0.00             | yes                 | class III    |
| YLR091W    | GEP5                 | 0.75             | yes                 | class III    |
| YLR244C    | MAP1                 | 0.00             | no                  | class III    |
| YLR308W    | CDA2                 | 0.00             | yes                 | class III    |
| YLR320W    | MMS22                | 0.00             | no                  | class III    |
| YLR362W    | STE11                | 0.00             | yes                 | class III    |
| YLR418C    | CDC73                | 0.00             | yes                 | class III    |
| YLR439W    | MRPL4                | 0.75             | no                  | class III    |
| YLR442C    | SIR3                 | 0.00             | yes                 | class III    |
| YML008C    | ERG6                 | 0.00             | no                  | class III    |
| YML022W    | APT1                 | 0.00             | no                  | class III    |
| YMR001C-A  |                      | 0.00             | no                  | class III    |
| YMR058W    | FET3                 | 0.50             | no                  | class III    |
| YMR097C    | MTG1                 | 0.75             | yes                 | class III    |
| YMR158W    | MRPS8                | 0.75             | yes                 | class III    |



| <b>ORF</b>     | <b>standard name</b> | <b>pet score</b> | <b>reproducible</b> | <b>class</b> |
|----------------|----------------------|------------------|---------------------|--------------|
| <i>YMR287C</i> | <i>DSS1</i>          | 0.75             | yes                 | class III    |
| <i>YNL080C</i> | <i>EOS1</i>          | 0.25             | yes                 | class III    |
| <i>YNR048W</i> |                      | 0.00             | yes                 | class III    |
| <i>YNR068C</i> |                      | 0.00             | no                  | class III    |
| <i>YOL058W</i> | <i>ARG1</i>          | 0.00             | no                  | class III    |
| <i>YOL093W</i> | <i>TRM10</i>         | 0.00             | no                  | class III    |
| <i>YOL162W</i> |                      | 0.00             | no                  | class III    |
| <i>YOR033C</i> | <i>EXO1</i>          | 0.00             | yes                 | class III    |
| <i>YOR212W</i> | <i>STE4</i>          | 0.00             | yes                 | class III    |
| <i>YOR371C</i> | <i>GPB1</i>          | 0.00             | yes                 | class III    |
| <i>YPL006W</i> | <i>NCR1</i>          | 0.00             | yes                 | class III    |
| <i>YPL031C</i> | <i>PHO85</i>         | 0.50             | no                  | class III    |
| <i>YPL045W</i> | <i>VPS16</i>         | 0.75             | no                  | class III    |
| <i>YPL049C</i> | <i>DIG1</i>          | 0.00             | yes                 | class III    |
| <i>YPL248C</i> | <i>GAL4</i>          | 0.00             | no                  | class III    |
| <i>YPL254W</i> | <i>HFI1</i>          | 0.50             | yes                 | class III    |
| <i>YPL270W</i> | <i>MDL2</i>          | 0.00             | no                  | class III    |
| <i>YPR021C</i> | <i>AGC1</i>          | 0.00             | no                  | class III    |

**Table S4.** Genomic complementation of class II *pet* mutants by crossing with  $\Delta mip1$ . This table contains the systematic gene name according to SGD, the standard gene name according to SGD, the *pet* score, and the rescue of the *pet* phenotype in heterozygous diploid strains.

Stenger et al. - Table S4

| ORF       | standard name | <i>pet</i> score | $\Delta mip1$ cross |
|-----------|---------------|------------------|---------------------|
| YGR174C   | <i>CBP4</i>   | 0.75             | rescued             |
| YHR050W-A |               | 0.33             | rescued             |
| YLR393W   | <i>ATP10</i>  | 0.75             | rescued             |
| YAL048C   | <i>GEM1</i>   | 0.50             | not rescued         |
| YBL002W   | <i>HTB2</i>   | 0.50             | not rescued         |
| YBL044W   |               | 0.50             | not rescued         |
| YBR122C   | <i>MRPL36</i> | 1.00             | not rescued         |
| YCR004C   | <i>YCP4</i>   | 0.50             | not rescued         |
| YCR046C   | <i>IMG1</i>   | 1.00             | not rescued         |
| YDL040C   | <i>NAT1</i>   | 0.25             | not rescued         |
| YDL063C   | <i>SYO1</i>   | 0.50             | not rescued         |
| YDL133C-A | <i>RPL41B</i> | 0.25             | not rescued         |
| YDL146W   | <i>LDB17</i>  | 0.50             | not rescued         |
| YDR042C   |               | 0.50             | not rescued         |
| YDR078C   | <i>SHU2</i>   | 0.50             | not rescued         |
| YDR507C   | <i>GIN4</i>   | 0.50             | not rescued         |
| YDR518W   | <i>EUG1</i>   | 0.50             | not rescued         |
| YDR521W   |               | 0.25             | not rescued         |
| YDR523C   | <i>SPS1</i>   | 0.50             | not rescued         |
| YEL036C   | <i>ANP1</i>   | 0.25             | not rescued         |
| YER103W   | <i>SSA4</i>   | 0.50             | not rescued         |
| YER110C   | <i>KAP123</i> | 0.50             | not rescued         |
| YER122C   | <i>GLO3</i>   | 0.50             | not rescued         |
| YER169W   | <i>RPH1</i>   | 0.50             | not rescued         |
| YGL107C   | <i>RMD9</i>   | 0.75             | not rescued         |
| YGL220W   | <i>BOL2</i>   | 0.50             | not rescued         |
| YGL240W   | <i>DOC1</i>   | 0.75             | not rescued         |
| YHR120W   | <i>MSH1</i>   | 1.00             | not rescued         |
| YHR175W-A |               | 0.33             | not rescued         |
| YIL012W   |               | 0.25             | not rescued         |
| YIL041W   | <i>GVP36</i>  | 0.25             | not rescued         |
| YJL027C   |               | 0.25             | not rescued         |
| YJR004C   | <i>SAG1</i>   | 0.50             | not rescued         |
| YJR150C   | <i>DAN1</i>   | 0.25             | not rescued         |
| YLL006W   | <i>MMM1</i>   | 0.50             | not rescued         |
| YLR114C   | <i>AVL9</i>   | 0.50             | not rescued         |
| YLR204W   | <i>QRI5</i>   | 0.50             | not rescued         |
| YLR288C   | <i>MEC3</i>   | 0.25             | not rescued         |
| YLR369W   | <i>SSQ1</i>   | 0.75             | not rescued         |
| YML088W   | <i>UFO1</i>   | 0.50             | not rescued         |
| YMR071C   | <i>TVP18</i>  | 0.50             | not rescued         |
| YMR072W   | <i>ABF2</i>   | 1.00             | not rescued         |
| YMR084W   |               | 0.50             | not rescued         |
| YMR184W   | <i>ADD37</i>  | 0.50             | not rescued         |
| YNL160W   | <i>YGP1</i>   | 0.50             | not rescued         |
| YNL170W   |               | 0.75             | not rescued         |
| YNL225C   | <i>CNM67</i>  | 0.50             | not rescued         |
| YOL100W   | <i>PKH2</i>   | 0.50             | not rescued         |

| <b>ORF</b>     | <b>standard name</b> | <b><i>pet</i> score</b> | <b><math>\Delta mip1</math> cross</b> |
|----------------|----------------------|-------------------------|---------------------------------------|
| <i>YOR241W</i> | <i>MET7</i>          | 1.00                    | not rescued                           |
| <i>YOR295W</i> | <i>UAF30</i>         | 0.25                    | not rescued                           |
| <i>YOR305W</i> | <i>RRG7</i>          | 1.00                    | not rescued                           |

**Table S5.** Genes required for maintenance of [*ARG8<sup>m</sup>*] mtDNA and expression of Arg8<sup>m</sup> in mitochondria. This table contains the systematic gene name according to SGD, the standard gene name according to SGD, the *pet* score, the results of the *ARG8<sup>m</sup>* screen, and for dubious ORFs a list of overlapping genomic features according to SGD. The table indicates how many independent biological replicates could be analyzed for each mutant and whether these behaved identically. 22 mutants that are either defective in arginine biosynthesis or mating or carry deletions of dubious ORFs are listed at the end of the table. They were excluded from further analysis.

Stenger et al. - Table S5

| ORF                                                 | standard name | <i>pet</i> score | replicates | screen result | reproduced | overlapping ORFs |
|-----------------------------------------------------|---------------|------------------|------------|---------------|------------|------------------|
| <b>mtDNA metabolism</b>                             |               |                  |            |               |            |                  |
| YCR028C-A                                           | <i>RIM1</i>   | 1.00             | 2          | no rescue     | yes        |                  |
| YJR144W                                             | <i>MGM101</i> | 1.00             | 2          | no rescue     | yes        |                  |
| YOR330C                                             | <i>MIP1</i>   | 1.00             | 2          | no rescue     | no         |                  |
| <b>Mitochondrial transcription</b>                  |               |                  |            |               |            |                  |
| YFL036W                                             | <i>RPO41</i>  | 0.75             | 2          | no rescue     | yes        |                  |
| YMR228W                                             | <i>MTF1</i>   | 1.00             | 2          | no rescue     | yes        |                  |
| <b>Mitochondrial translation and RNA maturation</b> |               |                  |            |               |            |                  |
| YBL038W                                             | <i>MRPL16</i> | 0.75             | 2          | ambiguous     | yes        |                  |
| YBL080C                                             | <i>PET112</i> | 0.75             | 2          | rescue        | yes        |                  |
| YBL090W                                             | <i>MRP21</i>  | 1.00             | 2          | no rescue     | yes        |                  |
| YBR251W                                             | <i>MRPS5</i>  | 0.75             | 2          | rescue        | yes        |                  |
| YBR268W                                             | <i>MRPL37</i> | 0.75             | 2          | ambiguous     | yes        |                  |
| YBR282W                                             | <i>MRPL27</i> | 1.00             | 2          | ambiguous     | yes        |                  |
| YCR003W                                             | <i>MRPL32</i> | 1.00             | 2          | rescue        | yes        |                  |
| YCR024C                                             | <i>SLM5</i>   | 1.00             | 2          | no rescue     | yes        |                  |
| YCR046C                                             | <i>IMG1</i>   | 1.00             | 2          | no rescue     | yes        |                  |
| YCR071C                                             | <i>IMG2</i>   | 1.00             | 2          | rescue        | yes        |                  |
| YDL202W                                             | <i>MRPL11</i> | 0.75             | 2          | no rescue     | yes        |                  |
| YDR175C                                             | <i>RSM24</i>  | 1.00             | 2          | no rescue     | yes        |                  |
| YDR268W                                             | <i>MSW1</i>   | 0.75             | 2          | no rescue     | yes        |                  |
| YDR296W                                             | <i>MHR1</i>   | 0.75             | 2          | rescue        | yes        |                  |
| YDR322W                                             | <i>MRPL35</i> | 0.50             | 2          | ambiguous     | no         |                  |
| YDR350C                                             | <i>ATP22</i>  | 0.75             | 2          | ambiguous     | yes        |                  |
| YDR405W                                             | <i>MRP20</i>  | 0.75             | 2          | ambiguous     | no         |                  |
| YEL050C                                             | <i>RML2</i>   | 0.75             | 2          | ambiguous     | yes        |                  |
| YER050C                                             | <i>RSM18</i>  | 1.00             | 2          | no rescue     | yes        |                  |
| YER087W                                             | <i>AIM10</i>  | 1.00             | 2          | rescue        | yes        |                  |
| YGL107C                                             | <i>RMD9</i>   | 0.75             | 1          | no rescue     | nd         |                  |
| YGL129C                                             | <i>RSM23</i>  | 1.00             | 2          | no rescue     | yes        |                  |
| YGL143C                                             | <i>MRF1</i>   | 1.00             | 1          | rescue        | nd         |                  |
| YGR150C                                             | <i>CCM1</i>   | 1.00             | 2          | ambiguous     | no         |                  |
| YGR165W                                             | <i>MRPS35</i> | 0.50             | 2          | no rescue     | yes        |                  |
| YGR215W                                             | <i>RSM27</i>  | 1.00             | 2          | no rescue     | yes        |                  |
| YGR220C                                             | <i>MRPL9</i>  | 1.00             | 2          | rescue        | yes        |                  |
| YHL004W                                             | <i>MRP4</i>   | 1.00             | 2          | no rescue     | yes        |                  |
| YHR011W                                             | <i>DIA4</i>   | 1.00             | 2          | no rescue     | no         |                  |
| YHR091C                                             | <i>MSR1</i>   | 1.00             | 2          | no rescue     | no         |                  |
| YHR147C                                             | <i>MRPL6</i>  | 1.00             | 2          | rescue        | yes        |                  |
| YJL023C                                             | <i>PET130</i> | 0.50             | 1          | no rescue     | nd         |                  |
| YJL096W                                             | <i>MRPL49</i> | 1.00             | 2          | ambiguous     | yes        |                  |
| YJR113C                                             | <i>RSM7</i>   | 1.00             | 2          | rescue        | yes        |                  |
| YKL003C                                             | <i>MRP17</i>  | 1.00             | 1          | ambiguous     | nd         |                  |
| YKL155C                                             | <i>RSM22</i>  | 1.00             | 2          | no rescue     | no         |                  |
| YKL170W                                             | <i>MRPL38</i> | 1.00             | 1          | rescue        | nd         |                  |
| YKL194C                                             | <i>MST1</i>   | 1.00             | 2          | no rescue     | yes        |                  |
| YKR006C                                             | <i>MRPL13</i> | 1.00             | 2          | rescue        | no         |                  |
| YKR085C                                             | <i>MRPL20</i> | 0.75             | 1          | no rescue     | nd         |                  |

| ORF                                                      | standard name | pet score | replicates | screen result | reproduced | overlapping ORFs |
|----------------------------------------------------------|---------------|-----------|------------|---------------|------------|------------------|
| YLR139C                                                  | SLS1          | 1.00      | 2          | ambiguous     | no         |                  |
| YLR204W                                                  | QR15          | 0.50      | 1          | rescue        | nd         |                  |
| YMR097C                                                  | MTG1          | 0.75      | 2          | rescue        | yes        |                  |
| YMR257C                                                  | PET111        | 1.00      | 2          | rescue        | yes        |                  |
| YMR286W                                                  | MRPL33        | 1.00      | 2          | no rescue     | no         |                  |
| YMR293C                                                  | HER2          | 1.00      | 2          | rescue        | yes        |                  |
| YNL005C                                                  | MRP7          | 1.00      | 2          | no rescue     | no         |                  |
| YNL073W                                                  | MSK1          | 1.00      | 2          | no rescue     | yes        |                  |
| YNL081C                                                  | SWS2          | 1.00      | 2          | no rescue     | yes        |                  |
| YNL177C                                                  | MRPL22        | 1.00      | 2          | rescue        | yes        |                  |
| YNL252C                                                  | MRPL17        | 0.75      | 2          | no rescue     | yes        |                  |
| YNL284C                                                  | MRPL10        | 0.75      | 1          | no rescue     | nd         |                  |
| YNR036C                                                  | MRPS12        | 0.75      | 1          | no rescue     | nd         |                  |
| YNR037C                                                  | RSM19         | 1.00      | 2          | no rescue     | yes        |                  |
| YOL023W                                                  | IFM1          | 0.75      | 2          | rescue        | no         |                  |
| YOL033W                                                  | MSE1          | 1.00      | 2          | rescue        | no         |                  |
| YOR150W                                                  | MRPL23        | 1.00      | 2          | ambiguous     | no         |                  |
| YOR158W                                                  | PET123        | 1.00      | 2          | no rescue     | yes        |                  |
| YOR187W                                                  | TUF1          | 1.00      | 2          | no rescue     | yes        |                  |
| YOR201C                                                  | MRM1          | 0.50      | 2          | rescue        | yes        |                  |
| YOR205C                                                  | GEP3          | 0.75      | 2          | rescue        | yes        |                  |
| YPL005W                                                  | AEP3          | 0.75      | 2          | no rescue     | yes        |                  |
| YPL013C                                                  | MRPS16        | 1.00      | 1          | no rescue     | nd         |                  |
| YPL097W                                                  | MSY1          | 1.00      | 2          | no rescue     | yes        |                  |
| YPL118W                                                  | MRP51         | 0.75      | 2          | no rescue     | yes        |                  |
| YPL173W                                                  | MRPL40        | 1.00      | 2          | no rescue     | no         |                  |
| YPL183W-A                                                | RTC6          | 0.50      | 2          | no rescue     | no         |                  |
| YPR047W                                                  | MSF1          | 0.75      | 2          | rescue        | yes        |                  |
| YPR100W                                                  | MRPL51        | 0.75      | 2          | no rescue     | no         |                  |
| YPR116W                                                  | RRG8          | 1.00      | 1          | no rescue     | nd         |                  |
| <b>Respiratory chain components and assembly factors</b> |               |           |            |               |            |                  |
| YDR178W                                                  | SDH4          | 0.25      | 2          | rescue        | yes        |                  |
| YDR377W                                                  | ATP17         | 1.00      | 1          | rescue        | nd         |                  |
| YJL166W                                                  | QCR8          | 0.75      | 2          | no rescue     | no         |                  |
| YKL016C                                                  | ATP7          | 1.00      | 1          | rescue        | nd         |                  |
| YNL052W                                                  | COX5A         | 1.00      | 2          | no rescue     | no         |                  |
| YPL271W                                                  | ATP15         | 1.00      | 1          | rescue        | nd         |                  |
| <b>Mitochondrial fusion</b>                              |               |           |            |               |            |                  |
| YBR179C                                                  | FZO1          | 0.75      | 2          | no rescue     | yes        |                  |
| YDR470C                                                  | UGO1          | 0.25      | 2          | no rescue     | yes        |                  |
| YGR101W                                                  | PCP1          | 0.50      | 2          | no rescue     | yes        |                  |
| YOR211C                                                  | MGM1          | 1.00      | 2          | no rescue     | no         |                  |
| <b>Other mitochondrial function</b>                      |               |           |            |               |            |                  |
| YBL022C                                                  | PIM1          | 0.50      | 1          | rescue        | nd         |                  |
| YBR084W                                                  | MIS1          | 0.00      | 1          | rescue        | nd         |                  |
| YDL198C                                                  | GGC1          | 0.75      | 2          | rescue        | no         |                  |
| YER057C                                                  | HMF1          | 0.00      | 2          | no rescue     | no         |                  |
| YER154W                                                  | OXA1          | 1.00      | 2          | rescue        | yes        |                  |
| YFL016C                                                  | MDJ1          | 1.00      | 2          | no rescue     | yes        |                  |

| <b>ORF</b>                      | <b>standard name</b> | <b>pet score</b> | <b>replicates</b> | <b>screen result</b> | <b>reproduced</b> | <b>overlapping ORFs</b> |
|---------------------------------|----------------------|------------------|-------------------|----------------------|-------------------|-------------------------|
| <i>YGR257C</i>                  | <i>MTM1</i>          | 0.50             | 2                 | rescue               | yes               |                         |
| <i>YJL200C</i>                  | <i>ACO2</i>          | 0.00             | 1                 | rescue               | nd                |                         |
| <i>YKL134C</i>                  | <i>OCT1</i>          | 1.00             | 2                 | no rescue            | yes               |                         |
| <i>YMR267W</i>                  | <i>PPA2</i>          | 1.00             | 2                 | ambiguous            | no                |                         |
| <i>YOR045W</i>                  | <i>TOM6</i>          | 0.00             | 2                 | rescue               | no                |                         |
| <i>YPL029W</i>                  | <i>SUV3</i>          | 0.75             | 2                 | rescue               | yes               |                         |
| <i>YPL059W</i>                  | <i>GRX5</i>          | 0.75             | 1                 | rescue               | nd                |                         |
| <i>YPL188W</i>                  | <i>POS5</i>          | 0.25             | 1                 | rescue               | nd                |                         |
| <i>YPL270W</i>                  | <i>MDL2</i>          | 0.00             | 2                 | rescue               | yes               |                         |
| <b>Vacuole-related function</b> |                      |                  |                   |                      |                   |                         |
| <i>YCL005W-A</i>                | <i>VMA9</i>          | 1.00             | 1                 | rescue               | nd                |                         |
| <i>YDR069C</i>                  | <i>DOA4</i>          | 0.25             | 1                 | rescue               | nd                |                         |
| <i>YDR136C</i>                  | <i>VPS61</i>         | 0.00             | 2                 | rescue               | no                |                         |
| <i>YEL027W</i>                  | <i>VMA3</i>          | 0.75             | 1                 | rescue               | nd                |                         |
| <i>YEL051W</i>                  | <i>VMA8</i>          | 0.75             | 2                 | ambiguous            | no                |                         |
| <i>YGL095C</i>                  | <i>VPS45</i>         | 0.50             | 2                 | ambiguous            | yes               |                         |
| <i>YGR105W</i>                  | <i>VMA21</i>         | 1.00             | 2                 | rescue               | yes               |                         |
| <i>YHR026W</i>                  | <i>VMA16</i>         | 0.75             | 1                 | rescue               | nd                |                         |
| <i>YKLO02W</i>                  | <i>DID4</i>          | 0.75             | 1                 | rescue               | nd                |                         |
| <i>YKLO41W</i>                  | <i>VPS24</i>         | 0.00             | 2                 | rescue               | yes               |                         |
| <i>YKLO80W</i>                  | <i>VMA5</i>          | 1.00             | 1                 | rescue               | nd                |                         |
| <i>YLR261C</i>                  | <i>VPS63</i>         | 0.00             | 1                 | rescue               | nd                |                         |
| <i>YLR396C</i>                  | <i>VPS33</i>         | 0.75             | 2                 | no rescue            | yes               |                         |
| <i>YLR417W</i>                  | <i>VPS36</i>         | 0.00             | 2                 | ambiguous            | yes               |                         |
| <i>YOR106W</i>                  | <i>VAM3</i>          | 0.00             | 2                 | rescue               | yes               |                         |
| <i>YPL002C</i>                  | <i>SNF8</i>          | 0.00             | 2                 | rescue               | yes               |                         |
| <i>YPL084W</i>                  | <i>BRO1</i>          | 0.00             | 1                 | rescue               | nd                |                         |
| <b>Other function</b>           |                      |                  |                   |                      |                   |                         |
| <i>YBR019C</i>                  | <i>GAL10</i>         | 0.00             | 2                 | rescue               | yes               |                         |
| <i>YBR020W</i>                  | <i>GAL1</i>          | 0.00             | 1                 | no rescue            | nd                |                         |
| <i>YBR191W</i>                  | <i>RPL21A</i>        | 0.00             | 2                 | ambiguous            | no                |                         |
| <i>YBR270C</i>                  | <i>BIT2</i>          | 0.00             | 2                 | rescue               | no                |                         |
| <i>YDR005C</i>                  | <i>MAF1</i>          | 0.00             | 2                 | rescue               | yes               |                         |
| <i>YDR017C</i>                  | <i>KCS1</i>          | 0.00             | 2                 | rescue               | no                |                         |
| <i>YDR079C-A</i>                | <i>TFB5</i>          | 0.33             | 2                 | rescue               | no                |                         |
| <i>YDR123C</i>                  | <i>INO2</i>          | 0.00             | 2                 | rescue               | no                |                         |
| <i>YDR138W</i>                  | <i>HPR1</i>          | 0.25             | 2                 | no rescue            | yes               |                         |
| <i>YDR244W</i>                  | <i>PEX5</i>          | 0.00             | 2                 | rescue               | yes               |                         |
| <i>YDR289C</i>                  | <i>RTT103</i>        | 0.00             | 1                 | rescue               | nd                |                         |
| <i>YDR349C</i>                  | <i>YPS7</i>          | 0.00             | 2                 | rescue               | no                |                         |
| <i>YDR477W</i>                  | <i>SNF1</i>          | 0.75             | 1                 | rescue               | nd                |                         |
| <i>YEL044W</i>                  | <i>IES6</i>          | 0.25             | 1                 | no rescue            | nd                |                         |
| <i>YEL062W</i>                  | <i>NPR2</i>          | 0.00             | 1                 | rescue               | nd                |                         |
| <i>YER070W</i>                  | <i>RNR1</i>          | 0.50             | 1                 | ambiguous            | nd                |                         |
| <i>YFL053W</i>                  | <i>DAK2</i>          | 0.00             | 2                 | rescue               | no                |                         |
| <i>YGL023C</i>                  | <i>PIB2</i>          | 0.00             | 2                 | rescue               | no                |                         |
| <i>YGL084C</i>                  | <i>GUP1</i>          | 0.25             | 2                 | no rescue            | yes               |                         |
| <i>YGL203C</i>                  | <i>KEX1</i>          | 0.00             | 2                 | rescue               | no                |                         |
| <i>YGR077C</i>                  | <i>PEX8</i>          | 0.00             | 2                 | rescue               | no                |                         |



| ORF                          | standard name | pet score | replicates | screen result | reproduced | overlapping ORFs |
|------------------------------|---------------|-----------|------------|---------------|------------|------------------|
| YHL011C                      | PRS3          | 0.00      | 2          | no rescue     | yes        |                  |
| YJL121C                      | RPE1          | 0.50      | 1          | rescue        | nd         |                  |
| YJL157C                      | FAR1          | 0.00      | 1          | no rescue     | nd         |                  |
| YJR073C                      | OPI3          | 0.00      | 2          | rescue        | yes        |                  |
| YKL038W                      | RGT1          | 0.00      | 1          | ambiguous     | nd         |                  |
| YKL179C                      | COY1          | 0.00      | 2          | rescue        | no         |                  |
| YKR055W                      | RHO4          | 0.00      | 1          | rescue        | nd         |                  |
| YLR182W                      | SWI6          | 0.00      | 2          | no rescue     | no         |                  |
| YLR350W                      | ORM2          | 0.25      | 2          | no rescue     | no         |                  |
| YLR351C                      | NIT3          | 0.00      | 2          | no rescue     | no         |                  |
| YLR403W                      | SFP1          | 0.00      | 1          | rescue        | nd         |                  |
| YMR180C                      | CTL1          | 0.00      | 2          | rescue        | no         |                  |
| YMR285C                      | NGL2          | 0.00      | 2          | rescue        | no         |                  |
| YNL064C                      | YDJ1          | 0.25      | 2          | no rescue     | no         |                  |
| YNL286W                      | CUS2          | 0.00      | 2          | rescue        | no         |                  |
| YNL323W                      | LEM3          | 0.00      | 1          | rescue        | nd         |                  |
| YNL327W                      | EGT2          | 0.00      | 2          | rescue        | no         |                  |
| YOL039W                      | RPP2A         | 0.00      | 2          | no rescue     | no         |                  |
| YOL081W                      | IRA2          | 0.00      | 1          | rescue        | nd         |                  |
| YOL108C                      | INO4          | 0.00      | 1          | rescue        | nd         |                  |
| YOL145C                      | CTR9          | 0.00      | 1          | rescue        | nd         |                  |
| YOR014W                      | RTS1          | 0.00      | 1          | rescue        | nd         |                  |
| YOR021C                      | SFM1          | 0.00      | 2          | rescue        | no         |                  |
| YOR027W                      | STI1          | 0.00      | 2          | no rescue     | no         |                  |
| YOR171C                      | LCB4          | 0.00      | 2          | rescue        | no         |                  |
| YOR295W                      | UAF30         | 0.25      | 1          | no rescue     | nd         |                  |
| YOR307C                      | SLY41         | 0.00      | 2          | rescue        | no         |                  |
| YPL031C                      | PHO85         | 0.50      | 1          | ambiguous     | nd         |                  |
| YPL069C                      | BTS1          | 0.00      | 2          | ambiguous     | no         |                  |
| <b>Unknown function</b>      |               |           |            |               |            |                  |
| YDR065W                      | RRG1          | 1.00      | 2          | rescue        | yes        |                  |
| YDR114C                      |               | 1.00      | 2          | rescue        | no         | MRX14            |
| YLR255C                      |               | 0.00      | 2          | no rescue     | no         |                  |
| YMR066W                      | SOV1          | 0.75      | 2          | no rescue     | yes        |                  |
| YNL133C                      | FYV6          | 0.25      | 2          | rescue        | yes        |                  |
| YNL184C                      |               | 1.00      | 1          | no rescue     | nd         | MRPL19           |
| YNL213C                      | RRG9          | 1.00      | 1          | rescue        | nd         |                  |
| YPL056C                      | LCL1          | 0.00      | 1          | no rescue     | nd         |                  |
| YPL205C                      |               | 0.00      | 2          | rescue        | no         |                  |
| <b>Arginine biosynthesis</b> |               |           |            |               |            |                  |
| YER069W                      | ARG5,6        | 0.00      | 2          | rescue        | yes        |                  |
| YHR018C                      | ARG4          | 0.00      | 2          | rescue        | yes        |                  |
| YJL088W                      | ARG3          | 0.00      | 2          | rescue        | yes        |                  |
| YJR109C                      | CPA2          | 0.00      | 2          | rescue        | yes        |                  |
| YOL058W                      | ARG1          | 0.00      | 2          | rescue        | yes        |                  |
| YOR303W                      | CPA1          | 0.00      | 2          | rescue        | yes        |                  |
| <b>Dubious ORF</b>           |               |           |            |               |            |                  |
| YCL007C                      |               | 1.00      | 2          | rescue        | no         | VMA9             |
| YER068C-A                    |               | 0.00      | 2          | rescue        | yes        | ARG5,6           |

| <b>ORF</b>       | <b>standard name</b> | <b>pet score</b> | <b>replicates</b> | <b>screen result</b> | <b>reproduced</b> | <b>overlapping ORFs</b> |
|------------------|----------------------|------------------|-------------------|----------------------|-------------------|-------------------------|
| <i>YGL218W</i>   |                      | 0.75             | 2                 | rescue               | no                | <i>MDM34</i>            |
| <i>YGR219W</i>   |                      | 0.75             | 2                 | rescue               | yes               | <i>MRPL9</i>            |
| <i>YJL120W</i>   |                      | 0.75             | 2                 | ambiguous            | no                | <i>RPE1</i>             |
| <i>YJL175W</i>   |                      | 0.25             | 1                 | no rescue            | nd                | <i>SWI3</i>             |
| <i>YJR114W</i>   |                      | 1.00             | 2                 | no rescue            | yes               | <i>RSM7</i>             |
| <i>YKL076C</i>   | <i>PSY1</i>          | 0.00             | 1                 | no rescue            | nd                | <i>YKL075C</i>          |
| <i>YKL169C</i>   |                      | 1.00             | 2                 | rescue               | yes               | <i>MRPL38</i>           |
| <i>YKL177W</i>   |                      | 0.00             | 2                 | no rescue            | yes               | <i>STE3</i>             |
| <b>Mating</b>    |                      |                  |                   |                      |                   |                         |
| <i>YCR020W-B</i> | <i>HTL1</i>          | 0.25             | 1                 | no rescue            | nd                |                         |
| <i>YGL032C</i>   | <i>AGA2</i>          | 0.00             | 2                 | rescue               | no                |                         |
| <i>YHL007C</i>   | <i>STE20</i>         | 0.00             | 1                 | no rescue            | nd                |                         |
| <i>YKL178C</i>   | <i>STE3</i>          | 0.00             | 2                 | no rescue            | yes               |                         |
| <i>YLR452C</i>   | <i>SST2</i>          | 0.00             | 2                 | no rescue            | no                |                         |
| <i>YML008C</i>   | <i>ERG6</i>          | 0.00             | 2                 | no rescue            | yes               |                         |

**Table S6.** Genes required for maintenance of [ARG8<sup>m</sup>] mtDNA. 89 strains that showed an instable mtDNA phenotype (see Table S5) were re-analyzed by cytoduction with the [ARG8<sup>m</sup> rho<sup>+</sup>] mitochondrial genome and mating with the  $\Delta arg8$  [rho<sup>0</sup>] strain. Then, cells were stained with DAPI and analyzed by fluorescence microscopy. nd, not determined.

Stenger et al. - Table S6

| ORF     | standard name | growth on media lacking arginine |                                              | DAPI staining: |
|---------|---------------|----------------------------------|----------------------------------------------|----------------|
|         |               | after cytoduction                | after mating with $\Delta arg8$ [ $\rho^0$ ] | mtDNA          |
| YPL005W | AEP3          | no                               | no                                           | no             |
| YDR350C | ATP22         | no                               | no                                           | no             |
| YPL069C | BTS1          | no                               | yes                                          | yes            |
| YGR150C | CCM1          | nd                               | nd                                           | nd             |
| YNL052W | COX5A         | no                               | no                                           | no             |
| YHR011W | DIA4          | no                               | no                                           | no             |
| YJL157C | FAR1          | no                               | yes                                          | yes            |
| YBR179C | FZO1          | no                               | no                                           | no             |
| YBR020W | GAL1          | no                               | yes                                          | yes            |
| YGL084C | GUP1          | yes                              | yes                                          | nd             |
| YER057C | HMF1          | no                               | yes                                          | yes            |
| YDR138W | HPR1          | no                               | no                                           | no             |
| YEL044W | IES6          | yes                              | yes                                          | nd             |
| YCR046C | IMG1          | no                               | no                                           | no             |
| YPL056C | LCL1          | no                               | no                                           | no             |
| YFL016C | MDJ1          | no                               | no                                           | no             |
| YOR211C | MGM1          | no                               | no                                           | no             |
| YJR144W | MGM101        | no                               | no                                           | no             |
| YOR330C | MIP1          | no                               | no                                           | no             |
| YKL003C | MRP17         | no                               | no                                           | no             |
| YDR405W | MRP20         | no                               | no                                           | no             |
| YBL090W | MRP21         | no                               | no                                           | no             |
| YHL004W | MRP4          | no                               | no                                           | no             |
| YPL118W | MRP51         | no                               | no                                           | no             |
| YNL005C | MRP7          | no                               | no                                           | no             |
| YNL284C | MRPL10        | no                               | no                                           | no             |
| YDL202W | MRPL11        | no                               | no                                           | no             |
| YBL038W | MRPL16        | no                               | no                                           | no             |
| YNL252C | MRPL17        | no                               | no                                           | no             |
| YKR085C | MRPL20        | no                               | no                                           | no             |
| YOR150W | MRPL23        | no                               | no                                           | no             |
| YBR282W | MRPL27        | no                               | no                                           | no             |
| YMR286W | MRPL33        | no                               | no                                           | yes            |
| YDR322W | MRPL35        | no                               | no                                           | no             |
| YBR268W | MRPL37        | no                               | no                                           | no             |
| YPL173W | MRPL40        | no                               | no                                           | yes            |
| YJL096W | MRPL49        | no                               | no                                           | no             |
| YPR100W | MRPL51        | no                               | no                                           | no             |
| YNR036C | MRPS12        | no                               | no                                           | no             |
| YPL013C | MRPS16        | no                               | no                                           | no             |
| YGR165W | MRPS35        | no                               | no                                           | no             |
| YNL073W | MSK1          | no                               | no                                           | no             |
| YHR091C | MSR1          | no                               | no                                           | yes            |
| YKL194C | MST1          | no                               | no                                           | no             |
| YDR268W | MSW1          | no                               | no                                           | no             |
| YPL097W | MSY1          | no                               | no                                           | no             |
| YMR228W | MTF1          | no                               | no                                           | no             |

| ORF       | standard name | growth on media lacking arginine |                                                             | DAPI staining: |
|-----------|---------------|----------------------------------|-------------------------------------------------------------|----------------|
|           |               | after cytoduction                | after mating with $\Delta arg8$ [ <i>rho</i> <sup>0</sup> ] | mtDNA          |
| YLR351C   | NIT3          | nd                               | nd                                                          | nd             |
| YKL134C   | OCT1          | no                               | no                                                          | no             |
| YLR350W   | ORM2          | yes                              | yes                                                         | nd             |
| YGR101W   | PCP1          | no                               | no                                                          | no             |
| YOR158W   | PET123        | no                               | no                                                          | no             |
| YJL023C   | PET130        | no                               | no                                                          | no             |
| YPL031C   | PHO85         | nd                               | nd                                                          | nd             |
| YMR267W   | PPA2          | no                               | no                                                          | no             |
| YHL011C   | PRS3          | yes                              | yes                                                         | nd             |
| YJL166W   | QCR8          | no                               | yes                                                         | yes            |
| YKLO38W   | RGT1          | yes                              | yes                                                         | nd             |
| YCR028C-A | RIM1          | no                               | no                                                          | no             |
| YGL107C   | RMD9          | no                               | no                                                          | yes            |
| YEL050C   | RML2          | no                               | no                                                          | no             |
| YER070W   | RNR1          | no                               | yes                                                         | yes            |
| YBR191W   | RPL21A        | no                               | yes                                                         | yes            |
| YFL036W   | RPO41         | no                               | no                                                          | no             |
| YOL039W   | RPP2A         | no                               | no                                                          | no             |
| YPR116W   | RRG8          | no                               | no                                                          | no             |
| YER050C   | RSM18         | no                               | no                                                          | no             |
| YNR037C   | RSM19         | no                               | no                                                          | no             |
| YKL155C   | RSM22         | nd                               | nd                                                          | nd             |
| YGL129C   | RSM23         | no                               | no                                                          | no             |
| YDR175C   | RSM24         | no                               | no                                                          | no             |
| YGR215W   | RSM27         | no                               | no                                                          | no             |
| YPL183W-A | RTC6          | nd                               | nd                                                          | nd             |
| YCR024C   | SLM5          | nd                               | nd                                                          | nd             |
| YLR139C   | SLS1          | nd                               | nd                                                          | nd             |
| YMR066W   | SOV1          | no                               | no                                                          | no             |
| YOR027W   | STI1          | yes                              | yes                                                         | nd             |
| YLR182W   | SWI6          | nd                               | nd                                                          | nd             |
| YNL081C   | SWS2          | no                               | no                                                          | no             |
| YOR187W   | TUF1          | no                               | no                                                          | yes            |
| YOR295W   | UAF30         | no                               | no                                                          | no             |
| YDR470C   | UGO1          | no                               | no                                                          | no             |
| YEL051W   | VMA8          | no                               | yes                                                         | yes            |
| YLR396C   | VPS33         | no                               | no                                                          | no             |
| YLR417W   | VPS36         | no                               | yes                                                         | yes            |
| YGL095C   | VPS45         | no                               | yes                                                         | yes            |
| YNL064C   | YDJ1          | no                               | yes                                                         | yes            |
| YLR255C   | YLR255C       | yes                              | yes                                                         | nd             |
| YNL184C   | YNL184C       | nd                               | nd                                                          | nd             |

**Table S7.** Combined results of five systematic screens to identify genes required for maintenance of mtDNA. The column "this study" lists the 57 [*rho*<sup>0</sup>] mutants shown in Table 4; Merz and Westermann (2009) identified 119 mutants lacking mtDNA in the yeast deletion collection after mating with  $\Delta mip1$  and cytoduction with wild type mtDNA [18]; Zhang and Singh (2014) identified 102 [*rho*<sup>0</sup>] strains by DAPI staining of 466 *pet* mutants [71]; Göke et al. (2020) identified 180 mutants lacking mtDNA by colony hybridization of the yeast deletion collection with probes specific for mtDNA [72]; and Puddu et al. (2019) identified 303 biological replicates comprising 165 gene deletions with mtDNA copy number of less than 1 by genome sequencing of strains of the yeast deletion collection [73]. It should be noted that the screens performed by Merz and Westermann (2009) [18], Göke et al. (2020) [72], and Puddu et al. (2019) [73] cannot discriminate between [*rho*<sup>0</sup>] and [*rho*<sup>-</sup>] strains.

## References

18. Merz S, Westermann B (2009). Genome-wide deletion mutant analysis reveals genes required for respiratory growth, mitochondrial genome maintenance and mitochondrial protein synthesis in *Saccharomyces cerevisiae*. **Genome Biol** 10(9): R95. doi: 10.1186/gb-2009-10-9-r95.
71. Zhang H, Singh KK (2014). Global genetic determinants of mitochondrial DNA copy number. **PLoS One** 9(8): e105242. doi: 10.1371/journal.pone.0105242.
72. Göke A, Schrott S, Mizrak A, Belyy V, Osman C, Walter P (2020). Mrx6 regulates mitochondrial DNA copy number in *Saccharomyces cerevisiae* by engaging the evolutionarily conserved Lon protease Pim1. **Mol Biol Cell** 31(7): 527-545. doi: 10.1091/mbc.E19-08-0470.
73. Puddu F, Herzog M, Selivanova A, Wang S, Zhu J, Klein-Lavi S, Gordon M, Meirman R, Millan-Zambrano G, Ayestaran I, Salguero I, Sharan R, Li R, Kupiec M, Jackson SP (2019). Genome architecture and stability in the *Saccharomyces cerevisiae* knockout collection. **Nature** 573(7774): 416-420. doi: 10.1038/s41586-019-1549-9.

Stenger et al. - Table S7

| Standard name                                     | ORF            | <i>pet</i> score | wt mtDNA present |           |           |           |           |
|---------------------------------------------------|----------------|------------------|------------------|-----------|-----------|-----------|-----------|
|                                                   |                |                  | this study       | ref. [18] | ref. [71] | ref. [72] | ref. [73] |
| <b>Lack of mtDNA reported in all five screens</b> |                |                  |                  |           |           |           |           |
| <i>DIA4</i>                                       | <i>YHR011W</i> | 1.00             | no               | no        | no        | no        | no        |
| <i>FZO1</i>                                       | <i>YBR179C</i> | 0.75             | no               | no        | no        | no        | no        |
| <i>MDJ1</i>                                       | <i>YFL016C</i> | 1.00             | no               | no        | no        | no        | no        |
| <i>MGM101</i>                                     | <i>YJR144W</i> | 1.00             | no               | no        | no        | no        | no        |
| <i>MIP1</i>                                       | <i>YOR330C</i> | 1.00             | no               | no        | no        | no        | no        |
| <i>MRP21</i>                                      | <i>YBL090W</i> | 1.00             | no               | no        | no        | no        | no        |
| <i>MRPL17</i>                                     | <i>YNL252C</i> | 0.75             | no               | no        | no        | no        | no        |
| <i>MRPL23</i>                                     | <i>YOR150W</i> | 1.00             | no               | no        | no        | no        | no        |
| <i>MRPL27</i>                                     | <i>YBR282W</i> | 1.00             | no               | no        | no        | no        | no        |
| <i>MRPL37</i>                                     | <i>YBR268W</i> | 0.75             | no               | no        | no        | no        | no        |
| <i>MRPS16</i>                                     | <i>YPL013C</i> | 1.00             | no               | no        | no        | no        | no        |
| <i>MSY1</i>                                       | <i>YPL097W</i> | 1.00             | no               | no        | no        | no        | no        |
| <i>OCT1</i>                                       | <i>YKL134C</i> | 1.00             | no               | no        | no        | no        | no        |
| <i>RML2</i>                                       | <i>YEL050C</i> | 0.75             | no               | no        | no        | no        | no        |
| <i>RRG8</i>                                       | <i>YPR116W</i> | 1.00             | no               | no        | no        | no        | no        |
| <i>RSM18</i>                                      | <i>YER050C</i> | 1.00             | no               | no        | no        | no        | no        |
| <i>RSM19</i>                                      | <i>YNR037C</i> | 1.00             | no               | no        | no        | no        | no        |
| <i>RSM23</i>                                      | <i>YGL129C</i> | 1.00             | no               | no        | no        | no        | no        |
| <i>RSM27</i>                                      | <i>YGR215W</i> | 1.00             | no               | no        | no        | no        | no        |
| <i>SWS2</i>                                       | <i>YNL081C</i> | 1.00             | no               | no        | no        | no        | no        |
| <b>Lack of mtDNA reported in four screens</b>     |                |                  |                  |           |           |           |           |
| <i>AEP3</i>                                       | <i>YPL005W</i> | 0.75             | no               |           | no        | no        | no        |
| <i>CCM1</i>                                       | <i>YGR150C</i> | 1.00             |                  | no        | no        | no        | no        |
| <i>MEF2</i>                                       | <i>YJL102W</i> | 0.75             |                  | no        | no        | no        | no        |
| <i>MET7</i>                                       | <i>YOR241W</i> | 1.00             |                  | no        | no        | no        | no        |
| <i>MGM1</i>                                       | <i>YOR211C</i> | 1.00             | no               | no        |           | no        | no        |
| <i>MRF1</i>                                       | <i>YGL143C</i> | 1.00             |                  | no        | no        | no        | no        |
| <i>MRP20</i>                                      | <i>YDR405W</i> | 0.75             | no               |           | no        | no        | no        |
| <i>MRP51</i>                                      | <i>YPL118W</i> | 0.75             | no               |           | no        | no        | no        |
| <i>MRP7</i>                                       | <i>YNL005C</i> | 1.00             | no               |           | no        | no        | no        |
| <i>MRPL11</i>                                     | <i>YDL202W</i> | 0.75             | no               |           | no        | no        | no        |
| <i>MRPL16</i>                                     | <i>YBL038W</i> | 0.75             | no               |           | no        | no        | no        |
| <i>MRPL32</i>                                     | <i>YCR003W</i> | 1.00             |                  | no        | no        | no        | no        |
| <i>MRPL35</i>                                     | <i>YDR322W</i> | 0.50             | no               |           | no        | no        | no        |
| <i>MRPL38</i>                                     | <i>YKL170W</i> | 1.00             |                  | no        | no        | no        | no        |
| <i>MRPL40</i>                                     | <i>YPL173W</i> | 1.00             |                  | no        | no        | no        | no        |
| <i>MRPL49</i>                                     | <i>YJL096W</i> | 1.00             | no               | no        |           | no        | no        |
| <i>MRPL51</i>                                     | <i>YPR100W</i> | 0.75             | no               |           | no        | no        | no        |
| <i>MRPL6</i>                                      | <i>YHR147C</i> | 1.00             |                  | no        | no        | no        | no        |
| <i>MRPL8</i>                                      | <i>YJL063C</i> | 0.75             |                  | no        | no        | no        | no        |
| <i>MRPS12</i>                                     | <i>YNR036C</i> | 0.75             | no               |           | no        | no        | no        |
| <i>MRPS8</i>                                      | <i>YMR158W</i> | 0.75             |                  | no        | no        | no        | no        |
| <i>MSE1</i>                                       | <i>YOL033W</i> | 1.00             |                  | no        | no        | no        | no        |
| <i>MSH1</i>                                       | <i>YHR120W</i> | 1.00             |                  | no        | no        | no        | no        |
| <i>MSK1</i>                                       | <i>YNL073W</i> | 1.00             | no               | no        | no        | no        |           |
| <i>MSW1</i>                                       | <i>YDR268W</i> | 0.75             | no               |           | no        | no        | no        |

| Standard name                                  | ORF              | <i>pet</i> score | wt mtDNA present |           |           |           |           |
|------------------------------------------------|------------------|------------------|------------------|-----------|-----------|-----------|-----------|
|                                                |                  |                  | this study       | ref. [18] | ref. [71] | ref. [72] | ref. [73] |
| <i>MTF1</i>                                    | <i>YMR228W</i>   | 1.00             | no               | no        |           | no        | no        |
| <i>MTG2</i>                                    | <i>YHR168W</i>   | 0.75             |                  | no        | no        | no        | no        |
| <i>NAM2</i>                                    | <i>YLR382C</i>   | 0.75             |                  | no        | no        | no        | no        |
| <i>PET100</i>                                  | <i>YDR079W</i>   | 1.00             |                  | no        | no        | no        | no        |
| <i>PET123</i>                                  | <i>YOR158W</i>   | 1.00             | no               | no        |           | no        | no        |
| <i>PPA2</i>                                    | <i>YMR267W</i>   | 1.00             | no               | no        |           | no        | no        |
| <i>RSM22</i>                                   | <i>YKL155C</i>   | 1.00             |                  | no        | no        | no        | no        |
| <i>RSM24</i>                                   | <i>YDR175C</i>   | 1.00             | no               | no        |           | no        | no        |
| <i>SLM5</i>                                    | <i>YCR024C</i>   | 1.00             |                  | no        | no        | no        | no        |
| <i>SOV1</i>                                    | <i>YMR066W</i>   | 0.75             | no               |           | no        | no        | no        |
| <i>YTA12</i>                                   | <i>YMR089C</i>   | 1.00             |                  | no        | no        | no        | no        |
| <b>Lack of mtDNA reported in three screens</b> |                  |                  |                  |           |           |           |           |
| <i>ABF2</i>                                    | <i>YMR072W</i>   | 1.00             |                  |           | no        | no        | no        |
| <i>AFG3</i>                                    | <i>YER017C</i>   | 0.75             |                  |           | no        | no        | no        |
| <i>ATP15</i>                                   | <i>YPL271W</i>   | 1.00             |                  | no        |           | no        | no        |
| <i>ATP22</i>                                   | <i>YDR350C</i>   | 0.75             | no               | no        |           | no        |           |
| <i>ATP25</i>                                   | <i>YMR098C</i>   | 1.00             |                  | no        |           | no        | no        |
| <i>ATP4</i>                                    | <i>YPL078C</i>   | 1.00             |                  | no        | no        | no        |           |
| <i>ATP5</i>                                    | <i>YDR298C</i>   | 1.00             |                  |           | no        | no        | no        |
| <i>DOC1</i>                                    | <i>YGL240W</i>   | 0.75             |                  | no        |           | no        | no        |
| <i>DSS1</i>                                    | <i>YMR287C</i>   | 0.75             |                  | no        |           | no        | no        |
| <i>EUG1</i>                                    | <i>YDR518W</i>   | 0.50             |                  |           | no        | no        | no        |
| <i>GEP5</i>                                    | <i>YLR091W</i>   | 0.75             |                  | no        | no        | no        |           |
| <i>GTF1</i>                                    | <i>YGR102C</i>   | 0.50             |                  | no        | no        |           | no        |
| <i>HER2</i>                                    | <i>YMR293C</i>   | 1.00             |                  | no        |           | no        | no        |
| <i>HMI1</i>                                    | <i>YOL095C</i>   | 0.75             |                  | no        | no        |           | no        |
| <i>IMG1</i>                                    | <i>YCR046C</i>   | 1.00             | no               |           |           | no        | no        |
| <i>IMG2</i>                                    | <i>YCR071C</i>   | 1.00             |                  | no        |           | no        | no        |
| <i>ISA2</i>                                    | <i>YPR067W</i>   | 1.00             |                  | no        | no        | no        |           |
| <i>MEF1</i>                                    | <i>YLR069C</i>   | 0.75             |                  | no        | no        | no        |           |
| <i>MHR1</i>                                    | <i>YDR296W</i>   | 0.75             |                  | no        |           | no        | no        |
| <i>MRH4</i>                                    | <i>YGL064C</i>   | 0.25             |                  |           | no        | no        | no        |
| <i>MRM1</i>                                    | <i>YOR201C</i>   | 0.50             |                  |           | no        | no        | no        |
| <i>MRP1</i>                                    | <i>YDR347W</i>   | 0.75             |                  | no        |           | no        | no        |
| <i>MRP10</i>                                   | <i>YDL045W-A</i> | 0.75             |                  | no        |           | no        | no        |
| <i>MRP17</i>                                   | <i>YKL003C</i>   | 1.00             | no               | no        |           | no        |           |
| <i>MRPL10</i>                                  | <i>YNL284C</i>   | 0.75             | no               |           |           | no        | no        |
| <i>MRPL13</i>                                  | <i>YKR006C</i>   | 1.00             |                  | no        |           | no        | no        |
| <i>MRPL20</i>                                  | <i>YKR085C</i>   | 0.75             | no               |           | no        |           | no        |
| <i>MRPL22</i>                                  | <i>YNL177C</i>   | 1.00             |                  | no        |           | no        | no        |
| <i>MRPL24</i>                                  | <i>YMR193W</i>   | 0.75             |                  | no        | no        |           | no        |
| <i>MRPL25</i>                                  | <i>YGR076C</i>   | 0.75             |                  | no        | no        |           | no        |
| <i>MRPL7</i>                                   | <i>YDR237W</i>   | 0.75             |                  |           | no        | no        | no        |
| <i>MRPL9</i>                                   | <i>YGR220C</i>   | 1.00             |                  |           | no        | no        | no        |
| <i>MRPS28</i>                                  | <i>YDR337W</i>   | 0.75             |                  | no        | no        |           | no        |
| <i>MRPS35</i>                                  | <i>YGR165W</i>   | 0.50             | no               |           |           | no        | no        |
| <i>MRPS5</i>                                   | <i>YBR251W</i>   | 0.75             |                  | no        | no        | no        |           |
| <i>MSD1</i>                                    | <i>YPL104W</i>   | 0.75             |                  | no        | no        |           | no        |



| Standard name                                | ORF              | <i>pet</i> score | wt mtDNA present |           |           |           |           |
|----------------------------------------------|------------------|------------------|------------------|-----------|-----------|-----------|-----------|
|                                              |                  |                  | this study       | ref. [18] | ref. [71] | ref. [72] | ref. [73] |
| <i>MSF1</i>                                  | <i>YPR047W</i>   | 0.75             |                  |           | no        | no        | no        |
| <i>MSR1</i>                                  | <i>YHR091C</i>   | 1.00             |                  | no        | no        | no        |           |
| <i>MSS116</i>                                | <i>YDR194C</i>   | 0.75             |                  | no        |           | no        | no        |
| <i>MST1</i>                                  | <i>YKL194C</i>   | 1.00             | no               | no        |           | no        |           |
| <i>MTF2</i>                                  | <i>YDL044C</i>   | 0.75             |                  | no        |           | no        | no        |
| <i>MTM1</i>                                  | <i>YGR257C</i>   | 0.50             |                  |           | no        | no        | no        |
| <i>PCP1</i>                                  | <i>YGR101W</i>   | 0.50             | no               |           |           | no        | no        |
| <i>PET130</i>                                | <i>YJL023C</i>   | 0.50             | no               |           |           | no        | no        |
| <i>RIM1</i>                                  | <i>YCR028C-A</i> | 1.00             | no               |           |           | no        | no        |
| <i>RPO41</i>                                 | <i>YFL036W</i>   | 0.75             | no               |           | no        | no        |           |
| <i>RRF1</i>                                  | <i>YHR038W</i>   | 0.75             |                  | no        | no        |           | no        |
| <i>RRG1</i>                                  | <i>YDR065W</i>   | 1.00             |                  | no        | no        | no        |           |
| <i>RRG7</i>                                  | <i>YOR305W</i>   | 1.00             |                  |           | no        | no        | no        |
| <i>RSM7</i>                                  | <i>YJR113C</i>   | 1.00             |                  |           | no        | no        | no        |
| <i>SLS1</i>                                  | <i>YLR139C</i>   | 1.00             |                  | no        |           | no        | no        |
| <i>SSQ1</i>                                  | <i>YLR369W</i>   | 0.75             |                  | no        | no        | no        |           |
| <i>SUV3</i>                                  | <i>YPL029W</i>   | 0.75             |                  |           | no        | no        | no        |
| <i>TUF1</i>                                  | <i>YOR187W</i>   | 1.00             |                  | no        | no        | no        |           |
| <i>YDR114C</i>                               | <i>YDR114C</i>   | 1.00             |                  | no        | no        | no        |           |
| <i>YKL169C</i>                               | <i>YKL169C</i>   | 1.00             |                  | no        |           | no        | no        |
| <i>YNL184C</i>                               | <i>YNL184C</i>   | 1.00             |                  | no        |           | no        | no        |
| <i>YOR199W</i>                               | <i>YOR199W</i>   | 0.50             |                  |           | no        | no        | no        |
| <b>Lack of mtDNA reported in two screens</b> |                  |                  |                  |           |           |           |           |
| <i>AEP1</i>                                  | <i>YMR064W</i>   | 1.00             |                  | no        |           | no        |           |
| <i>AEP2</i>                                  | <i>YMR282C</i>   | 0.75             |                  | no        |           |           | no        |
| <i>ATP14</i>                                 | <i>YLR295C</i>   | 0.50             |                  | no        | no        |           |           |
| <i>ATP17</i>                                 | <i>YDR377W</i>   | 1.00             |                  | no        |           | no        |           |
| <i>ATP7</i>                                  | <i>YKL016C</i>   | 1.00             |                  |           |           | no        | no        |
| <i>ERG5</i>                                  | <i>YMR015C</i>   | 0.25             |                  | no        |           |           | no        |
| <i>EXO5</i>                                  | <i>YBR163W</i>   | 0.50             |                  |           |           | no        | no        |
| <i>GEP3</i>                                  | <i>YOR205C</i>   | 0.75             |                  |           | no        | no        |           |
| <i>GGC1</i>                                  | <i>YDL198C</i>   | 0.75             |                  |           |           | no        | no        |
| <i>GIN4</i>                                  | <i>YDR507C</i>   | 0.50             |                  |           |           | no        | no        |
| <i>GLO3</i>                                  | <i>YER122C</i>   | 0.50             |                  |           |           | no        | no        |
| <i>GRX5</i>                                  | <i>YPL059W</i>   | 0.75             |                  |           | no        | no        |           |
| <i>HEM14</i>                                 | <i>YER014W</i>   | 0.67             |                  |           | no        | no        |           |
| <i>HPR1</i>                                  | <i>YDR138W</i>   | 0.25             | no               |           |           |           | no        |
| <i>IBA57</i>                                 | <i>YJR122W</i>   | 1.00             |                  |           | no        | no        |           |
| <i>IRC19</i>                                 | <i>YLL033W</i>   | 0.75             |                  | no        |           |           | no        |
| <i>ISA1</i>                                  | <i>YLL027W</i>   | 1.00             |                  | no        |           | no        |           |
| <i>ISM1</i>                                  | <i>YPL040C</i>   | 0.25             |                  |           | no        |           | no        |
| <i>KAP123</i>                                | <i>YER110C</i>   | 0.50             |                  |           | no        | no        |           |
| <i>LCB5</i>                                  | <i>YLR260W</i>   | 0.75             |                  |           | no        | no        |           |
| <i>MDM12</i>                                 | <i>YOL009C</i>   | 0.50             |                  | no        |           |           | no        |
| <i>MMM1</i>                                  | <i>YLL006W</i>   | 0.50             |                  |           |           | no        | no        |
| <i>MRP2</i>                                  | <i>YPR166C</i>   | 0.50             |                  |           | no        |           | no        |
| <i>MRP4</i>                                  | <i>YHL004W</i>   | 1.00             | no               |           |           | no        |           |
| <i>MRPL15</i>                                | <i>YLR312W-A</i> | 1.00             |                  | no        |           | no        |           |

| Standard name                               | ORF              | <i>pet</i> score | wt mtDNA present |           |           |           |           |  |
|---------------------------------------------|------------------|------------------|------------------|-----------|-----------|-----------|-----------|--|
|                                             |                  |                  | this study       | ref. [18] | ref. [71] | ref. [72] | ref. [73] |  |
| <i>MRPL31</i>                               | <i>YKL138C</i>   | 0.75             |                  | no        | no        |           |           |  |
| <i>MRPL33</i>                               | <i>YMR286W</i>   | 1.00             |                  |           |           | no        | no        |  |
| <i>MRPL4</i>                                | <i>YLR439W</i>   | 0.75             |                  | no        |           |           | no        |  |
| <i>MRPS17</i>                               | <i>YMR188C</i>   | 0.50             |                  | no        |           |           | no        |  |
| <i>MRX14</i>                                | <i>YDR115W</i>   | 0.75             |                  | no        | no        |           |           |  |
| <i>MSM1</i>                                 | <i>YGR171C</i>   | 0.75             |                  | no        |           |           | no        |  |
| <i>MTG1</i>                                 | <i>YMR097C</i>   | 0.75             |                  |           | no        | no        |           |  |
| <i>OXA1</i>                                 | <i>YER154W</i>   | 1.00             |                  | no        |           | no        |           |  |
| <i>PET112</i>                               | <i>YBL080C</i>   | 0.75             |                  | no        |           |           | no        |  |
| <i>PET309</i>                               | <i>YLR067C</i>   | 1.00             |                  | no        |           |           | no        |  |
| <i>PHO85</i>                                | <i>YPL031C</i>   | 0.50             |                  |           |           | no        | no        |  |
| <i>PIF1</i>                                 | <i>YML061C</i>   | 0.75             |                  | no        |           |           | no        |  |
| <i>PPT2</i>                                 | <i>YPL148C</i>   | 0.75             |                  | no        | no        |           |           |  |
| <i>QRI5</i>                                 | <i>YLR204W</i>   | 0.50             |                  |           | no        | no        |           |  |
| <i>RMD9</i>                                 | <i>YGL107C</i>   | 0.75             |                  |           |           | no        | no        |  |
| <i>RNR4</i>                                 | <i>YGR180C</i>   | 1.00             |                  |           | no        | no        |           |  |
| <i>RPL1B</i>                                | <i>YGL135W</i>   | 0.75             |                  |           | no        |           | no        |  |
| <i>RRG9</i>                                 | <i>YNL213C</i>   | 1.00             |                  | no        |           | no        |           |  |
| <i>RTC6</i>                                 | <i>YPL183W-A</i> | 0.50             |                  |           |           | no        | no        |  |
| <i>UGO1</i>                                 | <i>YDR470C</i>   | 0.25             | no               |           |           | no        |           |  |
| <i>VPS33</i>                                | <i>YLR396C</i>   | 0.75             | no               |           |           | no        |           |  |
| <i>VPS45</i>                                | <i>YGL095C</i>   | 0.50             |                  |           | no        | no        |           |  |
| <i>YGR219W</i>                              | <i>YGR219W</i>   | 0.75             |                  |           |           | no        | no        |  |
| <i>YOR200W</i>                              | <i>YOR200W</i>   | 1.00             |                  |           |           | no        | no        |  |
| <i>YPR099C</i>                              | <i>YPR099C</i>   | 0.75             |                  |           |           | no        | no        |  |
| <b>Lack of mtDNA reported in one screen</b> |                  |                  |                  |           |           |           |           |  |
| <i>ACO1</i>                                 | <i>YLR304C</i>   | 0.75             |                  | no        |           |           |           |  |
| <i>ADD37</i>                                | <i>YMR184W</i>   | 0.50             |                  |           |           | no        |           |  |
| <i>AGP2</i>                                 | <i>YBR132C</i>   | 0.00             |                  |           |           | no        |           |  |
| <i>AIM10</i>                                | <i>YER087W</i>   | 1.00             |                  |           |           | no        |           |  |
| <i>AIM22</i>                                | <i>YJL046W</i>   | 1.00             |                  |           |           |           | no        |  |
| <i>ANP1</i>                                 | <i>YEL036C</i>   | 0.25             |                  |           |           | no        |           |  |
| <i>APN1</i>                                 | <i>YKL114C</i>   | 0.25             |                  | no        |           |           |           |  |
| <i>APN2</i>                                 | <i>YBL019W</i>   | 0.25             |                  | no        |           |           |           |  |
| <i>ATG34</i>                                | <i>YOL083W</i>   | 0.25             |                  | no        |           |           |           |  |
| <i>ATP10</i>                                | <i>YLR393W</i>   | 0.75             |                  |           |           |           | no        |  |
| <i>ATP3</i>                                 | <i>YBR039W</i>   | 1.00             |                  | no        |           |           |           |  |
| <i>AVL9</i>                                 | <i>YLR114C</i>   | 0.50             |                  |           |           | no        |           |  |
| <i>BOL2</i>                                 | <i>YGL220W</i>   | 0.50             |                  |           |           | no        |           |  |
| <i>BRE1</i>                                 | <i>YDL074C</i>   | 0.25             |                  |           |           |           | no        |  |
| <i>BRE2</i>                                 | <i>YLR015W</i>   | 0.00             |                  |           |           |           | no        |  |
| <i>BUD16</i>                                | <i>YEL029C</i>   | 0.25             |                  |           | no        |           |           |  |
| <i>CBP2</i>                                 | <i>YHL038C</i>   | 1.00             |                  | no        |           |           |           |  |
| <i>CBS1</i>                                 | <i>YDL069C</i>   | 0.75             |                  |           |           |           | no        |  |
| <i>CEM1</i>                                 | <i>YER061C</i>   | 1.00             |                  |           |           |           | no        |  |
| <i>CLC1</i>                                 | <i>YGR167W</i>   | 0.50             |                  | no        |           |           |           |  |
| <i>COX5A</i>                                | <i>YNL052W</i>   | 1.00             | no               |           |           |           |           |  |
| <i>CYC3</i>                                 | <i>YAL039C</i>   | 0.75             |                  | no        |           |           |           |  |

| Standard name | ORF            | <i>pet</i> score | wt mtDNA present |           |           |           |           |
|---------------|----------------|------------------|------------------|-----------|-----------|-----------|-----------|
|               |                |                  | this study       | ref. [18] | ref. [71] | ref. [72] | ref. [73] |
| <i>DCS1</i>   | <i>YLR270W</i> | 0.50             |                  |           |           | no        |           |
| <i>DID4</i>   | <i>YKL002W</i> | 0.75             |                  |           |           |           | no        |
| <i>ELO3</i>   | <i>YLR372W</i> | 0.00             |                  |           |           |           | no        |
| <i>FAB1</i>   | <i>YFR019W</i> | 0.25             |                  |           |           |           | no        |
| <i>GDH1</i>   | <i>YOR375C</i> | 0.25             |                  | no        |           |           |           |
| <i>GEM1</i>   | <i>YAL048C</i> | 0.50             |                  |           |           | no        |           |
| <i>GET1</i>   | <i>YGL020C</i> | 0.00             |                  |           |           |           | no        |
| <i>HAP3</i>   | <i>YBL021C</i> | 0.75             |                  | no        |           |           |           |
| <i>HDA2</i>   | <i>YDR295C</i> | 0.25             |                  |           |           | no        |           |
| <i>HFI1</i>   | <i>YPL254W</i> | 0.50             |                  | no        |           |           |           |
| <i>HSP31</i>  | <i>YDR533C</i> | 0.25             |                  |           |           |           | no        |
| <i>HTB2</i>   | <i>YBL002W</i> | 0.50             |                  |           |           | no        |           |
| <i>HTD2</i>   | <i>YHR067W</i> | 1.00             |                  |           |           |           | no        |
| <i>IFM1</i>   | <i>YOL023W</i> | 0.75             |                  |           |           |           | no        |
| <i>INH1</i>   | <i>YDL181W</i> | 0.33             |                  |           |           | no        |           |
| <i>IRC3</i>   | <i>YDR332W</i> | 0.50             |                  |           |           |           | no        |
| <i>LCL1</i>   | <i>YPL056C</i> | 0.00             | no               |           |           |           |           |
| <i>LDB17</i>  | <i>YDL146W</i> | 0.50             |                  |           |           | no        |           |
| <i>MAC1</i>   | <i>YMR021C</i> | 0.75             |                  |           |           |           | no        |
| <i>MBP1</i>   | <i>YDL056W</i> | 0.50             |                  |           |           |           | no        |
| <i>MDM10</i>  | <i>YAL010C</i> | 0.50             |                  |           |           |           | no        |
| <i>MDM38</i>  | <i>YOL027C</i> | 0.25             |                  |           |           |           | no        |
| <i>MEC3</i>   | <i>YLR288C</i> | 0.25             |                  |           |           | no        |           |
| <i>MOT2</i>   | <i>YER068W</i> | 0.25             |                  |           |           |           | no        |
| <i>MRP49</i>  | <i>YKL167C</i> | 0.25             |                  |           |           |           | no        |
| <i>MRPL19</i> | <i>YNL185C</i> | 1.00             |                  | no        |           |           |           |
| <i>MRPL28</i> | <i>YDR462W</i> | 0.25             |                  |           |           |           | no        |
| <i>MRPL36</i> | <i>YBR122C</i> | 1.00             |                  |           |           | no        |           |
| <i>MRPS9</i>  | <i>YBR146W</i> | 0.25             |                  | no        |           |           |           |
| <i>MRX1</i>   | <i>YER077C</i> | 0.25             |                  |           |           |           | no        |
| <i>NAT1</i>   | <i>YDL040C</i> | 0.25             |                  |           |           | no        |           |
| <i>NRP1</i>   | <i>YDL167C</i> | 0.50             |                  |           |           | no        |           |
| <i>PAF1</i>   | <i>YBR279W</i> | 0.00             |                  |           |           |           | no        |
| <i>PEP3</i>   | <i>YLR148W</i> | 0.50             |                  |           |           | no        |           |
| <i>PIM1</i>   | <i>YBL022C</i> | 0.50             |                  |           |           | no        |           |
| <i>PKH2</i>   | <i>YOL100W</i> | 0.50             |                  |           |           | no        |           |
| <i>PRO1</i>   | <i>YDR300C</i> | 0.25             |                  |           |           | no        |           |
| <i>PTC1</i>   | <i>YDL006W</i> | 0.00             |                  |           |           |           | no        |
| <i>QRI7</i>   | <i>YDL104C</i> | 0.25             |                  |           | no        |           |           |
| <i>RNR1</i>   | <i>YER070W</i> | 0.50             |                  | no        |           |           |           |
| <i>RPB4</i>   | <i>YJL140W</i> | 0.00             |                  |           |           | no        |           |
| <i>RPH1</i>   | <i>YER169W</i> | 0.50             |                  |           |           | no        |           |
| <i>RPP2A</i>  | <i>YOL039W</i> | 0.00             | no               |           |           |           |           |
| <i>RSM25</i>  | <i>YIL093C</i> | 0.25             |                  |           |           |           | no        |
| <i>RSM26</i>  | <i>YJR101W</i> | 0.00             |                  |           |           | no        |           |
| <i>SHU2</i>   | <i>YDR078C</i> | 0.50             |                  |           |           | no        |           |
| <i>SLA1</i>   | <i>YBL007C</i> | 0.25             |                  |           |           |           | no        |
| <i>SOD2</i>   | <i>YHR008C</i> | 0.25             |                  |           |           |           | no        |

| Standard name    | ORF              | <i>pet</i> score | wt mtDNA present |           |           |           |           |
|------------------|------------------|------------------|------------------|-----------|-----------|-----------|-----------|
|                  |                  |                  | this study       | ref. [18] | ref. [71] | ref. [72] | ref. [73] |
| <i>SPS1</i>      | <i>YDR523C</i>   | 0.50             |                  |           |           | no        |           |
| <i>SRF1</i>      | <i>YDL133W</i>   | 0.25             |                  | no        |           |           |           |
| <i>SSA4</i>      | <i>YER103W</i>   | 0.50             |                  |           |           | no        |           |
| <i>SUT1</i>      | <i>YGL162W</i>   | 0.00             |                  |           |           |           | no        |
| <i>SYO1</i>      | <i>YDL063C</i>   | 0.50             |                  |           |           | no        |           |
| <i>TDA5</i>      | <i>YLR426W</i>   | 0.00             |                  |           |           |           | no        |
| <i>THP1</i>      | <i>YOL072W</i>   | 0.00             |                  |           |           |           | no        |
| <i>TPM1</i>      | <i>YNL079C</i>   | 0.00             |                  |           |           |           | no        |
| <i>TVP18</i>     | <i>YMR071C</i>   | 0.50             |                  |           |           | no        |           |
| <i>UAF30</i>     | <i>YOR295W</i>   | 0.25             | no               |           |           |           |           |
| <i>UFO1</i>      | <i>YML088W</i>   | 0.50             |                  |           |           | no        |           |
| <i>VID22</i>     | <i>YLR373C</i>   | 0.00             |                  |           |           |           | no        |
| <i>VPS41</i>     | <i>YDR080W</i>   | 0.00             |                  |           |           |           | no        |
| <i>XYL2</i>      | <i>YLR070C</i>   | 0.25             |                  | no        |           |           |           |
| <i>YBL012C</i>   | <i>YBL012C</i>   | 0.25             |                  |           |           | no        |           |
| <i>YBL044W</i>   | <i>YBL044W</i>   | 0.50             |                  |           |           | no        |           |
| <i>YCP4</i>      | <i>YCR004C</i>   | 0.50             |                  |           |           | no        |           |
| <i>YDL032W</i>   | <i>YDL032W</i>   | 0.50             |                  |           |           |           | no        |
| <i>YDL057W</i>   | <i>YDL057W</i>   | 0.33             |                  |           |           | no        |           |
| <i>YDL062W</i>   | <i>YDL062W</i>   | 0.25             |                  |           |           | no        |           |
| <i>YDL129W</i>   | <i>YDL129W</i>   | 0.25             |                  | no        |           |           |           |
| <i>YDR042C</i>   | <i>YDR042C</i>   | 0.50             |                  |           |           | no        |           |
| <i>YDR521W</i>   | <i>YDR521W</i>   | 0.25             |                  |           |           | no        |           |
| <i>YGL218W</i>   | <i>YGL218W</i>   | 0.75             |                  |           |           |           | no        |
| <i>YGP1</i>      | <i>YNL160W</i>   | 0.50             |                  |           |           | no        |           |
| <i>YHR175W-A</i> | <i>YHR175W-A</i> | 0.33             |                  |           |           | no        |           |
| <i>YIL014C-A</i> | <i>YIL014C-A</i> | 0.25             |                  |           |           |           | no        |
| <i>YJL022W</i>   | <i>YJL022W</i>   | 0.25             |                  |           |           |           | no        |
| <i>YJL027C</i>   | <i>YJL027C</i>   | 0.25             |                  |           |           | no        |           |
| <i>YJR114W</i>   | <i>YJR114W</i>   | 1.00             |                  |           |           | no        |           |
| <i>YLR149C</i>   | <i>YLR149C</i>   | 0.25             |                  |           |           |           | no        |
| <i>YMC1</i>      | <i>YPR058W</i>   | 0.00             |                  |           |           |           | no        |
| <i>YMR084W</i>   | <i>YMR084W</i>   | 0.50             |                  |           |           | no        |           |
| <i>YNL170W</i>   | <i>YNL170W</i>   | 0.75             |                  |           |           | no        |           |
